1  
2  
3  
4  
5  
6  
7  
8  
9  
10  
11  
12  
13  
14  
15  
16  
17  
18  
19  
20  
21  
22  
23  
24  
25  
26  
27  
28  
29  
30  
31  
32  
33  
34  
35  
36  
37  
38  
39  
40  
41  
42  
43  
44  
45

## Endothelial cell flow-mediated quiescence is temporally regulated and utilizes the cell cycle inhibitor p27

Natalie T Tanke<sup>a</sup>, Ziqing Liu<sup>b</sup>, Michaelanthony T Gore<sup>b</sup>, Pauline Bougaran<sup>b</sup>, Mary B Linares<sup>b</sup>, Allison Marvin<sup>b</sup>, Arya Sharma<sup>b</sup>, Morgan Oatley<sup>b</sup>, Tianji Yu<sup>b</sup>, Kaitlyn Quigley<sup>b</sup>, Sarah Vest<sup>b</sup>, Jeanette Gowen Cook<sup>c</sup>, and Victoria L Bautch<sup>a,b,d,#</sup>

<sup>a</sup>Curriculum in Cell Biology and Physiology, The University of North Carolina at Chapel Hill, Chapel Hill, North Carolina 27599, USA

<sup>b</sup>Department of Biology, The University of North Carolina at Chapel Hill, Chapel Hill, North Carolina 27599, USA

<sup>c</sup>Department of Biochemistry and Biophysics, The University of North Carolina at Chapel Hill, Chapel Hill, North Carolina 27599, USA

<sup>d</sup>McAllister Heart Institute, The University of North Carolina at Chapel Hill, Chapel Hill, North Carolina 27599, USA

#Corresponding author: Victoria L Bautch, PhD  
Professor of Biology  
Department of Biology, CB#3280  
University of North Carolina at Chapel Hill  
Chapel Hill, NC 27599 USA  
Email: bautch@med.unc.edu

Running head: Regulation of flow-induced endothelial quiescence depth

Words 7,195

Figures: 8

Supplemental Figures: 6

Supplemental Tables: 2 + Key Resources Table

References: 65

Abstract: 265 words

**Keywords:** Endothelial cell, laminar shear stress, quiescence depth, p27, cell cycle, zebrafish, *HES1*, *ID3*

46 **ABSTRACT**

47

48 *Background:* Endothelial cells regulate their cell cycle as blood vessels remodel and  
49 transition to quiescence downstream of blood flow-induced mechanotransduction.  
50 Laminar blood flow leads to quiescence, but how flow-mediated quiescence is  
51 established and maintained is poorly understood.

52

53 *Methods:* Primary human endothelial cells were exposed to laminar flow regimens and  
54 gene expression manipulations, and quiescence depth was analyzed via time to cell  
55 cycle re-entry after flow cessation. Mouse and zebrafish endothelial expression patterns  
56 were examined via scRNA seq analysis, and mutant or morphant fish lacking p27 were  
57 analyzed for endothelial cell cycle regulation and *in vivo* cellular behaviors.

58

59 *Results:* Arterial flow-exposed endothelial cells had a distinct transcriptome, and they  
60 first entered a deep quiescence, then transitioned to shallow quiescence under  
61 homeostatic maintenance conditions. In contrast, venous-flow exposed endothelial cells  
62 entered deep quiescence early that did not change with homeostasis. The cell cycle  
63 inhibitor p27 (*CDKN1B*) was required to establish endothelial flow-mediated  
64 quiescence, and expression levels positively correlated with quiescence depth. p27 loss  
65 *in vivo* led to endothelial cell cycle upregulation and ectopic sprouting, consistent with  
66 loss of quiescence. *HES1* and *ID3*, transcriptional repressors of p27 upregulated by  
67 arterial flow, were required for quiescence depth changes and the reduced p27 levels  
68 associated with shallow quiescence.

69

70 *Conclusions:* Endothelial cell flow-mediated quiescence has unique properties and  
71 temporal regulation of quiescence depth that depends on the flow stimulus. These  
72 findings are consistent with a model whereby flow-mediated endothelial cell quiescence  
73 depth is temporally regulated downstream of p27 transcriptional regulation by HES1 and  
74 ID3. The findings are important in understanding endothelial cell quiescence mis-  
75 regulation that leads to vascular dysfunction and disease.

76

77

78

79

80

81

82

83 GRAPHICAL ABSTRACT

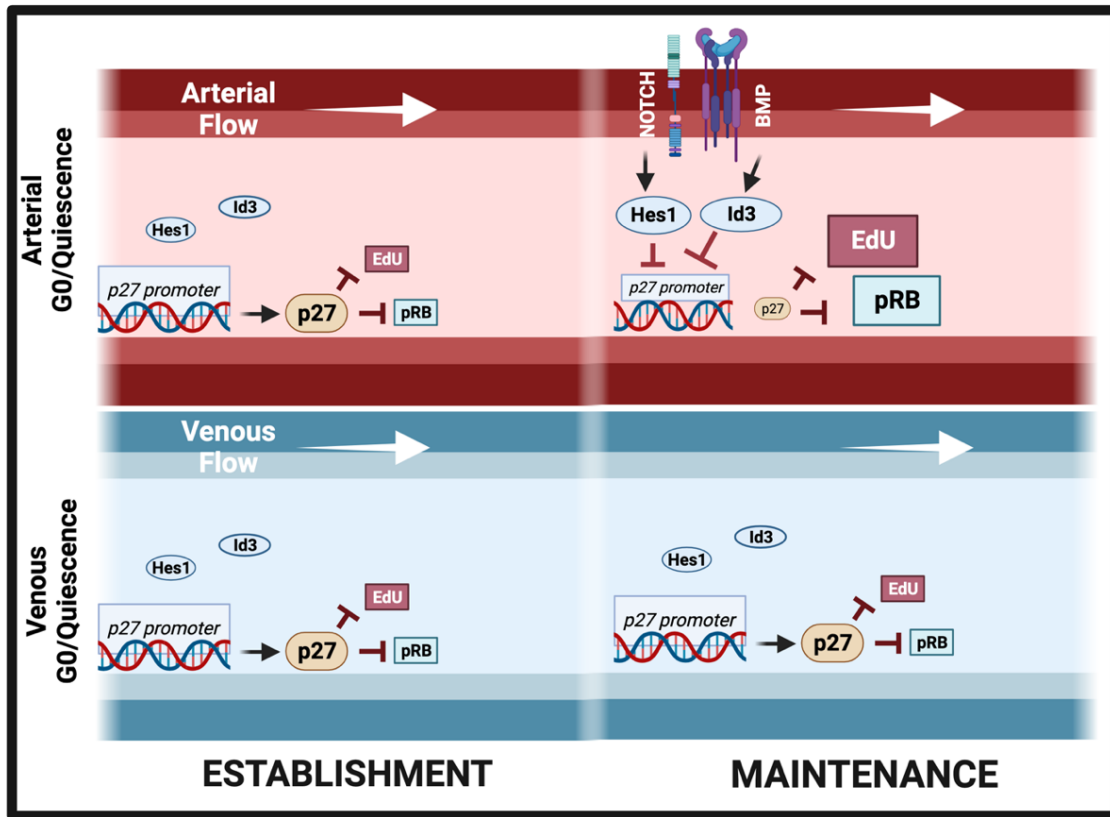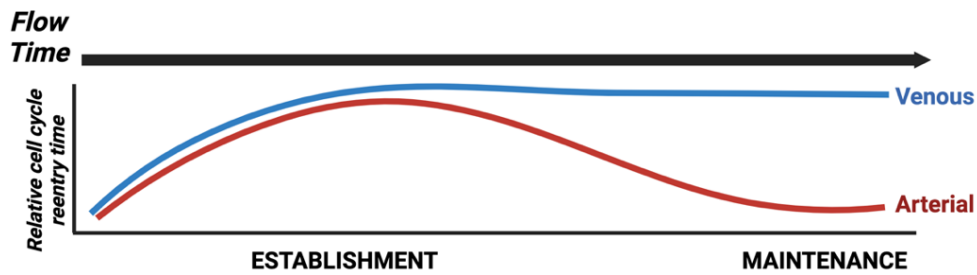

121 **HIGHLIGHTS**

- 122       • Different quiescence stimuli lead to distinct transcriptional and functional  
123       quiescence profiles in endothelial cells
- 124       • p27 is required for endothelial cell quiescence and depth is temporally regulated  
125       in a flow stimulus-dependent manner that correlates with p27 levels and flow-  
126       regulated repressors *HES1* and *ID3*
- 127       • p27 is expressed in endothelial cells according to flow magnitude *in vivo* and is  
128       functionally required for cell cycle regulation and sprouting *in vivo*

129 **INTRODUCTION**

130

131           Developmental blood vessel network expansion via sprouting angiogenesis leads  
132 to remodeling and homeostasis; this transition depends on endothelial cell responses to  
133 incoming signals, including laminar shear stress provided by blood flow. Laminar flow  
134 leads to endothelial cell cytoskeletal realignment and dramatically reduces  
135 proliferation<sup>1-6</sup>. Transcriptional profiles change with flow exposure<sup>7,8</sup>, and signaling  
136 pathways such as Notch and BMP are upregulated to promote alignment and vascular  
137 homeostasis<sup>9,10</sup>. Vascular homeostasis significantly represses endothelial cell  
138 proliferation and sets up a quiescent ( $G_0$ ) state that can be released by angiogenic  
139 growth factors such as VEGF-A<sup>7,11,12, 13-15</sup>. How flow-mediated vascular quiescence is  
140 established and maintained is poorly understood, yet it is critical to blood vessel  
141 function.

142

143           Quiescence is influenced by cell type in non-endothelial cells<sup>16,17</sup>, and  
144 quiescence stimuli such as growth factor deprivation or contact inhibition also influence  
145 quiescence parameters<sup>18</sup>. Different quiescence stimuli lead to transcriptional profiles  
146 that are partially overlapping but have strong unique signatures<sup>16,18</sup>; however, how  
147 these differences affect quiescence properties is poorly understood, and it is not known  
148 how endothelial cells differentially respond to quiescence cues.

149

150           The cell cycle is regulated by cyclins and cyclin-dependent kinases (CDKs) that  
151 promote and CDK inhibitors that block cell cycle progression<sup>19</sup>. In cycling cells, proteins  
152 are post-translationally modified and/or carry destabilization sequences that lead to

153 rapid gain and loss of function required for passage through the cell cycle<sup>20,21</sup>. In  
154 contrast, quiescence is characterized by transcriptional repression of cell cycle  
155 activators and often by upregulation of cell cycle inhibitors<sup>18,19</sup>. Thus, cell cycle reentry  
156 is delayed upon removal of the stimulus, and reentry time is used as a proxy for  
157 quiescence depth<sup>22,23</sup>. Quiescence depth is variable; for example, quiescent fibroblasts  
158 have delayed cell cycle reentry that positively correlates with temporal exposure to the  
159 quiescence stimulus<sup>22,23</sup>. Non-homogeneous quiescence depth is associated with  
160 muscle stem cells that respond to injury-induced circulating cues by entering a shallow  
161 quiescence called “G<sub>0</sub> alert” that allows for prompt proliferation in response to a  
162 subsequent injury<sup>24</sup>. Moreover, spontaneous quiescence was recently described,  
163 whereby epithelial cells enter quiescence absent obvious environmental or  
164 pharmacological cues, suggesting that quiescence entry has a stochastic component  
165 and/or complex inputs<sup>16,25</sup>. Thus, how quiescence is established, maintained, and exited  
166 is complex.

167

168 We examined properties of flow-induced endothelial cell quiescence and found  
169 that arterial laminar flow-induced endothelial cell quiescence had a distinct  
170 transcriptional profile and functionally exhibited dynamic temporal regulation of  
171 quiescence depth, while venous flow did not exhibit the same temporal regulation of  
172 quiescence depth. Temporal changes in endothelial cell quiescence depth positively  
173 correlated with expression of the cell cycle inhibitor p27, and p27 repression and  
174 temporal regulation of quiescence depth under arterial flow required *HES1* and *ID3*,  
175 targets of the Notch and BMP signaling pathways. A requirement for p27 for endothelial

176 quiescence *in vivo* and correlation of p27 expression with flow magnitude was revealed.  
177 Thus, flow-mediated endothelial cell quiescence is novel and complex, and regulation of  
178 quiescence depth correlates with flow stimulus and likely influences physiological and  
179 pathological vascular quiescence responses.

180

181

## 182 **MATERIALS AND METHODS**

183

### 184 ***Data availability***

185 Data associated with this study are available from the corresponding author upon  
186 reasonable request. **Key Resources Table** is in Supplementary File.

187

### 188 ***Cell culture***

189 HUVEC and HAEC were cultured according to the manufacturer's  
190 recommendations in EBM2 (Lonza#CC-3162) with growth factors (Lonza#CC-3162,  
191 EGM2) at 37°C, 5% CO<sub>2</sub> and used between passages 2-4 (**Key Resources Table, cell  
192 culture**). Critical experiments were replicated with multiple lots of HUVEC and with  
193 HAEC.

194

### 195 ***Microscopy***

196 Imaging was performed using confocal microscopy (Olympus Fluoview FV3000,  
197 IX83) and a UPlanSApo 40x silicone-immersion objective (NA 1.25), UPlanSApo 60x  
198 oil-immersion objective (NA 1.40), or UPlanSApo 100x oil-immersion objective (NA  
199 1.40). Images were acquired with Fluoview FV31S-SW software and imaging analysis

200 was completed in FIJI<sup>26</sup>. For each replicate within an experiment, images were acquired  
201 at the same settings.

202

### 203 ***Endothelial Cell Transfection***

204 HUVEC were grown to sub-confluency and treated with siRNAs (**Key Resources**  
205 **Table, siRNA information**) diluted in OptiMem (Gibco, #11058021) and Lipofectamine  
206 3000 (ThermoFisher, #L3000015) according to manufacturer's protocol  
207 ([https://www.thermofisher.com/us/en/home/references/protocols/cell-](https://www.thermofisher.com/us/en/home/references/protocols/cell-culture/transfection-protocol/lipofectamine-2000.html)  
208 [culture/transfection-protocol/lipofectamine-2000.html](https://www.thermofisher.com/us/en/home/references/protocols/cell-culture/transfection-protocol/lipofectamine-2000.html)). Briefly, siRNA at 0.48  $\mu$ M in Opti-  
209 MEM (31985-070, Gibco) and a 1:20 dilution of Lipofectamine in Opti-MEM were  
210 incubated separately at RT for 5 min, then combined and incubated at RT for 15 min.  
211 HUVEC were transfected at 80% confluency with siRNA at 37°C for 24h, then in 10 mL  
212 of fresh EGM-2. All experiments were initiated 48h following siRNA exposure.

213

### 214 ***Immunofluorescence and EdU labeling***

215 Endothelial cells were fixed in 4% PFA (15713 (100504-940), VWR) at 37°C for  
216 10 min, permeabilized in 0.1% Triton (T8787-100ML, Sigma) in PBS for 10 min at RT,  
217 then blocked for 1h at RT in 5% NBCS (Gibco, #16010-159), antibiotic-antimycotic  
218 (Gibco, #15240062), 0.1% sodium azide (Sigma s2002-100G). Following 3X PBS  
219 washes, cells were incubated in primary antibody/blocking solution and incubated for  
220 24h at 4°C (**Key Resources Table, antibodies**), washed 3X with PBS and incubated in  
221 secondary antibody/blocking solution for 3h at RT in the dark (**Key Resources Table,**  
222 **antibodies**). Slides were mounted with coverslips using Prolong Diamond Antifade



223 mounting media (P36961, Life Technology), sealed with nail polish, and stored at 4°C.  
224 Glass-bottom Ibidi slides or well dishes were stored in 1X PBS. For all nuclear stains,  
225 The DAPI channel was used as a nuclear mask, and nuclear fluorescence intensity was  
226 measured for each cell per image field. Positive cells were defined as those above the  
227 sensitivity threshold.

228

229 EdU labeling was performed according to the Click-IT EdU 488, 594, or 647  
230 protocol (Invitrogen, C10337). Cells were incubated in EdU for 30 min (quiescence  
231 depth) or 1h at 37°C in 5% CO<sub>2</sub> and fixed with 4% PFA for 10 min at RT.

232

### 233 ***Quiescence Depth***

234 Flow: HUVEC were cultured in EBM2 supplemented with 2% FBS, 1% antibiotic-  
235 antimycotic (Gibco, #15240062), and 1% Nystatin (Sigma, #N1638-20ML) and exposed  
236 to laminar flow for indicated times and shear levels using an Ibidi pump system (CC-  
237 1090, Ibidi). Static (non-flow) control slides were seeded at lower densities and  
238 incubated for 48h prior to fixation with 4% PFA. For western blot experiments, an orbital  
239 shaker (Hoefer Red Rotor Mixer Platform Shaker PR70-115V) was used as previously  
240 described<sup>27</sup>. Flow-mediated quiescence depth experiments were performed after 16h or  
241 72h of laminar flow exposure by incubation for 30 min with EdU, fixation at indicated  
242 times post-flow in 4% PFA for 10 min at RT, then visualized for EdU and/or stained for  
243 antibodies as described (**Supp. Tables S2, S3**).

244

245            Contact: HUVEC were seeded in a 6-well plate at  $1.2 \times 10^6$  cells/well (high  
246 density) or  $0.2 \times 10^6$  cells/well (low density) and incubated for 24h. A p1000 pipette tip  
247 was used to scrape the cell monolayer and create a gap, as previously described<sup>28</sup>,  
248 cells were incubated with EdU for 30 min or fixed at 0h, 2h, 5h, or 8h post-scratching in  
249 4% PFA for 10 min at RT, then visualized for EdU and/or stained for antibodies as  
250 described (**Supp. Table S2, S3**). Cells within 1000 $\mu$ m of the scratch edge were imaged  
251 (**Supp. Fig. 2a**).

252

### 253 ***Cell Axis Ratio***

254            Cell shape and alignment were measured as described previously<sup>7</sup>. Cells were  
255 stained for VE-cadherin upon fixation, and measured at the longest axis of cell divided  
256 by shortest axis to calculate the cell axis ratio, with the longest cell axis being the  
257 direction of flow.

258

### 259 ***Western Blot Analysis***

260            Western blot analysis was performed according to<sup>29</sup> with modifications. Briefly,  
261 cells were scraped into PBS, centrifuged at 13000 rpm (4°C, 20 min), resuspended in  
262 RIPA buffer with protease/phosphatase inhibitor (5872S, Cell Signaling), then added to  
263 sample loading buffer with dithiothreitol (R0861, Thermo Fisher) and boiled for 10 min.  
264 Samples (10 $\mu$ g) were separated on 10% SDS-PAGE gel (161-0183, BioRad), then  
265 transferred to a membrane, incubated in primary antibodies (overnight, 4°C) (**Key**  
266 **Resources Table, antibodies**), washed 3X in PBST and stained with secondary  
267 antibody in One-Block (RT, 1h) (**Key Resources Table, antibodies**). Immobilon Forte

268 HRP Substrate (WBLUF0100, 769 Millipore Sigma) was added for 30 sec, and blots  
269 were exposed for 2 sec ChemiDoc XRS with Chemi High Resolution setting.

270

## 271 **RNA**

272 RT-qPCR: Scraped cell pellets were resuspended in TRIzol (15596018,  
273 Invitrogen). cDNA was generated from 1ug RNA using iScript reverse transcription kit  
274 (Bio-Rad, #1708891) and diluted 1:3 in water. qRT-PCR was performed using iTaq  
275 Universal SYBR Green SuperMix (Bio-Rad, #1725121). SYBR Green real-time PCR  
276 was performed in triplicate on the Applied Biosystems QuantStudio 6 Flex Real-Time  
277 PCR System (**Key Resources Table, qPCR primers**). For quantification, relative  
278 expression of each gene to  $\beta$ -actin in each sample was calculated by  $2^{-CT}$  (CT of  
279 gene-CT of  $\beta$ -actin). Statistical significance was determined by unpaired Student's T-  
280 test.

281

282 Bulk RNA seq: 3 Ibbidi slides/condition were pooled, and stranded libraries were  
283 prepared using KAPA mRNA HyperPrep Kit (7961901001, Roche) and sequenced  
284 using NovaSeq S1 at the UNC Sequencing Core. Data was analyzed as described  
285 previously<sup>30</sup>. Briefly,  $2-3 \times 10^7$  50 bp paired-end reads per sample were obtained and  
286 mapped to the human genome GRCh38 with STAR using default settings<sup>31</sup>. Quality of  
287 sequencing reads was confirmed with FastQC before mapping. Mapping rate was over  
288 87% for all samples (**Supp. Table S2**), and gene (GEO GSE213323) expression was  
289 determined with Htseq-count using the union mode<sup>32</sup>. Genes with low expression were  
290 filtered out (total raw counts in all samples <10), differential expression analysis was

291 performed with DESeq2<sup>33</sup> using default settings in R, and lists of differentially  
292 expressed genes were obtained (p adjusted <0.1). Gene ontology analysis was  
293 performed using enrichGO function in the R package clusterProfiler. All gene ontology  
294 terms shown in this study have a corrected P value <0.1.

295

296 Mouse scRNAseq: A mouse scRNAseq dataset (Liu et al, in preparation) (GEO  
297 GSE216594) previously generated using enriched endothelial cells from the mouse ear  
298 at P8 (postnatal day 8) was analyzed for *Cdkn1b* levels in endothelial cells.

299

### 300 **Quiescence Score**

301 The endothelial quiescence score was calculated using the formula:  $QS =$   
302  $1/n \sum_{i=1}^n QSU_i - 1/m \sum_{j=1}^m QSD_j$  (QS = Quiescence Score, QSU = QS of upregulated genes  
303 under quiescence (total n genes), QSD = QS of downregulated genes under quiescence  
304 (total m genes)). Selected genes were upregulated or downregulated relative to static  
305 samples. All genes were normalized for sequencing depth and scaled for expression as  
306 previously described<sup>8</sup>. To generate the gene list used for endothelial quiescence score  
307 we utilized two datasets (**Supp. Table S1**): S/G<sub>2</sub>/M phase associated genes from the  
308 CellCycleScoring function of the R package Seurat that were down-regulated with flow  
309 in scRNAseq HUVEC (accession code GSE151867)<sup>8</sup>, and genes that were upregulated  
310 with different quiescence stimuli in non-endothelial cells<sup>18</sup> and upregulated with flow in  
311 scRNAseq data. The epithelial quiescence score was developed by the Barr lab as  
312 previously described, and utilized an independent gene list generated using non-  
313 transformed human epithelial cell data<sup>16,34</sup>.

314 **Zebrafish**

315 Zebrafish (*Danio rerio*) were housed in an IACUC approved facility<sup>30</sup>.  
316 *Tg(fli:LifeAct-GFP)* was a gift from Dr. Wiebke Herzog (**Key Resources Table,**  
317 **animals**). The *cdkn1bb* CRISPR line was designed as previously described (**Key**  
318 **Resources Table, genetically modified animals**)<sup>35</sup>. One-cell stage zebrafish embryos  
319 were injected with 1nl injection solution into the cytoplasm. Fin clips were used to  
320 identify possible founders with gene-flanking primers PCR (F-  
321 CTCAATAACTGCTGCGAGTG, R- GATGAAGGGGGGAAAGAGG, R-  
322 GCCATCGAGTCAAACCAG).

323

324 Morphant fish were obtained by randomly injecting 2.5–5 ng of non-targeting  
325 (NT) (5'-CCTCTTACCTCAGTTACAATTTATA-3', GeneTools, LLC) or *cdkn1bb* (5'-  
326 ACGGTCAAATTCAAAGCACATACC 3', GeneTools, LLC) MO into *Tg(fli:LifeAct-GFP)*  
327 embryos at the one-cell stage. Fish were grown in E3 medium at 28.5°C to 36hpf.

328

329 Embryos were prepared for imaging as previously described<sup>30</sup>. Briefly,  
330 dechorionated embryos were fixed overnight in ice-cold 4% PFA at 4 °C, rinsed 2X in  
331 PBS, mounted using Prolong Diamond Antifade mounting medium (P36961, Life  
332 Technology), and coverslip sealed with petroleum jelly.

333

334

335 ***Zebrafish FACs Sorting***

336 FACs sorting was as previously described<sup>36</sup>. Briefly, embryos were euthanized in  
337 1X Tricaine, dissociated with 100mg/mL collagenase in 1X PBS and 0.25% trypsin and  
338 harsh mechanical pipetting, and incubated (30°C, 10 min). The dissociation reaction  
339 was neutralized with DMEM + 10% FBS and cells were centrifuged (5000 rcf, 5 min).  
340 Pellets were resuspended in 500µL DMEM/FBS and filtered using a 30µm cell strainer.  
341 Samples were analyzed on the AttuneX (UNC Flow Cytometry Core), and GFP+ cells  
342 from *fli:LifeAct-GFP* embryos were collected into TRIzol.

343

344 ***Statistics***

345 Unpaired Students T-Test was used to determine statistical significance with two  
346 experimental groups, and One-Way ANOVA with Tukey correction was used for  
347 experimental groups  $\geq 3$ .  $\chi^2$  test was performed to compare distribution across 2 groups.  
348 All statistical tests and graphs were made using the Prism 9.4.1 software (GraphPad  
349 Software) and are described in relevant Figure Legends.

350

351 **RESULTS**

352

353 **Laminar flow-exposed endothelial cells have a distinct transcriptional profile**

354 Endothelial cells exposed to laminar shear stress exhibit alignment to the flow  
355 vector and reduced proliferation, hallmarks of vascular homeostasis or quiescence<sup>1,2,5</sup>.  
356 To determine whether endothelial cells exposed to laminar flow were transcriptionally  
357 quiescent, we utilized a published quiescence score formula generated in non-  
358 endothelial epithelial cells<sup>34</sup> and applied it to a scRNAseq dataset we previously

359 generated in primary endothelial cells (HUVEC, human umbilical vein endothelial cells)  
360 exposed to laminar flow<sup>8</sup>. This analysis revealed that endothelial cells exposed to  
361 homeostatic laminar flow (here called Flow-Maintenance (Flow-M) (15d/cm<sup>2</sup>, 72h)) had  
362 a significantly higher score than non-flowed control endothelial cells (**Fig. 1A**). Previous  
363 transcriptional characterization revealed 9 clusters primarily separated by flow condition,  
364 and the cluster containing the majority of cells exposed to flow (Flow Cluster 1) had a  
365 significantly higher epithelial quiescence score compared to the equivalent control  
366 cluster (Static Cluster 1), indicating that this quiescence score positively correlates with  
367 flow-exposed endothelial cells predicted to be quiescent. Quiescence score  
368 comparisons among minor flow clusters showed heterogeneity relative to Flow Cluster  
369 1, and a similar comparison of static clusters also revealed heterogeneity relative to  
370 Static Cluster 1, indicating that distinct clusters exhibit quiescence heterogeneity. As  
371 predicted, Flow Cluster 2, Static Cluster 2, and Mix Cluster (endothelial cells from flow  
372 and static conditions), previously defined as proliferative populations<sup>8</sup>, had a  
373 significantly reduced quiescence score (**Fig. 1A**).

374

375 We next used the scRNA seq dataset to generate an independent endothelial  
376 quiescence score algorithm. Since a hallmark of cellular quiescence is downregulation  
377 of proliferation markers and upregulation of cell cycle inhibitors<sup>18</sup>, this score was  
378 primarily generated using expression levels of cell cycle genes that were down- or  
379 upregulated in endothelial cells exposed to homeostatic laminar flow (Flow-M) (**Supp.**  
380 **Table 1**). The endothelial quiescence score was then applied to the dataset to verify  
381 that the score predicted the relationships. Consistent with the epithelial score, Flow

382 Cluster 1 had a significantly higher quiescence score compared to Static Cluster 1, and  
383 the proliferation-associated clusters associated had significantly lower scores (**Fig. 1B**).  
384 These findings indicate that endothelial cells exposed to homeostatic laminar flow  
385 (Flow-M) are in a transcriptionally quiescent cell cycle state.

386

387 Non-endothelial cells exposed to different quiescence stimuli have unique  
388 transcriptional profiles<sup>16,18</sup>, so we hypothesized that the mode of quiescence induction  
389 affects the quiescence score of endothelial cells. Application of the endothelial  
390 quiescence score algorithm to HUVEC bulk RNAseq data showed significant increases  
391 under flow and high density compared to static and low-density conditions, respectively  
392 (**Fig. 1C**), and these relationships held when the epithelial quiescence score algorithm  
393 was applied (**Supp. Fig. 1A**). Venn diagrams revealed that homeostatic laminar flow  
394 (Flow-M) and contact inhibition have both distinct and shared transcriptional changes in  
395 endothelial cells, with approximately 25% of regulated genes shared for up- and down-  
396 regulated categories (upregulated: 21.7% (494/2272) flow and 24.3% (494/2030)  
397 density shared genes; down-regulated 25.1% (573/2282) flow and 23.7% (573/2415)  
398 density shared genes) (**Supp. Fig. 1B**). Further analysis of highly differentially  
399 expressed genes revealed only one overlapping gene (*CCDC190*) that was  
400 downregulated between flow and high-density conditions, and no genes were highly  
401 upregulated with both flow and high density conditions, indicating that the quiescence  
402 profiles of endothelial cells exposed to extended laminar flow or high density are largely  
403 distinct (**Supp. Fig. 1C-F**). Further analysis revealed that expression of cell cycle  
404 activators was down-regulated regardless of quiescence induction stimulus, while cell



405 cycle inhibitor expression showed an increased trend with high density but not with  
406 homeostatic flow (**Fig. 1D-E**). Thus, endothelial cells respond to homeostatic laminar  
407 flow exposure with a distinct quiescence transcriptional profile compared to high  
408 density-induced quiescence that includes differences in how cell cycle inhibitors are  
409 regulated, suggesting unique properties of flow-mediated endothelial cell quiescence.

410

411 **Shallow quiescence depth characterizes endothelial cells exposed to extended**  
412 **laminar flow**

413 Quiescence depth, as defined by time to cell cycle reentry upon stimulus  
414 removal, varies in non-endothelial cells<sup>22-24</sup>. Because cell cycle inhibitor expression was  
415 not upregulated in endothelial cells exposed to laminar flow, we hypothesized that they  
416 are in a relatively shallow quiescence state. We assessed quiescence depth by  
417 measuring cell cycle reentry time after quiescence stimulus removal, via EdU labeling  
418 and pRB (phospho-retinoblastoma protein) expression (**Supp. Fig. 2A**)<sup>37,38</sup>. EdU labels  
419 cells in S-phase, and phosphorylation releases RB from E2F and permits progression  
420 through the G<sub>1</sub>-S checkpoint and proliferation<sup>38,39</sup>. Endothelial cells exposed to  
421 homeostatic laminar flow (Flow-M) or contact inhibition had significantly reduced EdU-  
422 labeled (**Fig. 2A-B, D-E**) and pRB+ cells (**Fig. 2A, C, D, F; Supp. Fig 2B-C**) at the end  
423 of the flow or contact inhibition period, consistent with previously published work<sup>7,12,40</sup>.  
424 HUVEC released from homeostatic flow (Flow-M) significantly increased EdU-labeled  
425 and pRB+ cells within 2h of flow cessation, while release from contact inhibition only  
426 showed significant increases in EdU-labeling and pRB reactivity 8h post-release (**Fig.**  
427 **2A-F, Supp. Fig. 2B-C**), and HAEC (human aortic endothelial cells) showed similar

428 stimulus-dependent differences in quiescence depth (**Supp. Fig. 2D-G**). Thus,  
429 endothelial cells exposed to homeostatic laminar flow (Flow-M) are less deeply  
430 quiescent compared to contact-inhibited cells, independent of endothelial subtype.

431

432 **Cell cycle inhibitor p27 expression correlates with quiescence depth and is**  
433 **required for flow-mediated quiescence**

434 The cell cycle inhibitor p27 (*CDKN1B*) is often upregulated with quiescence in  
435 non-endothelial cells<sup>41-43</sup>, so we analyzed endothelial p27 expression and found a  
436 highly significant decrease in *CDKN1B* RNA expression and p27+ HUVEC after  
437 exposure to homeostatic Flow-M (**Fig. 3A-C; Supp. Fig 3A,C**). In contrast, we  
438 confirmed that p27 RNA and protein levels significantly increased in contact inhibited  
439 HUVEC<sup>40</sup> (**Fig. 3D-F; Supp. Fig. 3B-C**), and HAEC also had reduced p27+ cells after  
440 exposure to homeostatic Flow-M (**Supp. Fig. 3D-E**). Taken together, these findings  
441 show that p27 expression positively correlates with quiescence depth in endothelial  
442 cells, independent of endothelial subtype.

443

444

445 We interrogated p27 function in endothelial flow-mediated quiescence via siRNA  
446 knockdown (KD) and found that p27 depletion and exposure to homeostatic flow (Flow-  
447 M) significantly increased EdU-labeling and staining for Ki67, a marker of cells in  
448 S/G<sub>2</sub>/M<sup>44</sup>, over controls (**Fig. 4A-B; Supp. Fig. 3F-H**). Transcriptional profiling of  
449 quiescent endothelial cells depleted for p27 under homeostatic flow or high density  
450 revealed little overlap in the profiles of genes up- or down-regulated between conditions  
451 (upregulated: 9.0% (12/133) flow and 8.6% (12/139) density shared genes; down-

452 regulated 13.4% (18/134) flow and 0.4% (18/313) density shared genes) (**Supp. Fig.**  
453 **4A**). Further analysis of highly differentially expressed genes revealed no overlap  
454 between p27 depleted cells and controls in either condition, and gene ontology (GO)  
455 comparison revealed no shared terms in either condition (**Supp. Fig. 4B-I**). These  
456 findings indicate that p27 is required for endothelial cell flow-mediated quiescence and  
457 affects transcriptional quiescence programs in a quiescence stimulus-dependent  
458 manner.

459

#### 460 **p27 regulates endothelial quiescence parameters *in vivo***

461 We asked whether p27 affects vascular processes *in vivo* and hypothesized that  
462 p27 loss would deregulate the endothelial cell cycle and angiogenic expansion. We  
463 generated a *cdkn1bb* (zebrafish p27 gene) mutant zebrafish line and found significant  
464 increases in expression of cell cycle regulators Ki67 (*miKi67*), PCNA (*pcna*) and  
465 CyclinD1 (*ccnd1*) in enriched endothelial cell populations from mutant embryos that had  
466 reduced p27 (*cdkn1bb*) (**Fig. 4C-F**). Analysis of vascular sprouting in *cdkn1bb*<sup>-/-</sup> fish  
467 revealed increased ectopic sprouts in the trunk vasculature that was phenocopied by  
468 morphant fish depleted for *cdkn1bb* (**Fig. 4G-H, K-L**). Regional quantification of ectopic  
469 sprouts along the anterior-posterior axis revealed that mutant or morphant embryos had  
470 more ectopic sprouts in the anterior position (**Fig. 4I-J, M**), suggesting that effects of  
471 p27 loss are more associated with mature vascular regions that are likely transitioning  
472 to homeostasis. Thus, p27 is required for endothelial cell cycle regulation and proper  
473 sprouting *in vivo* and likely affects quiescence establishment.

474

475 **Flow-mediated quiescence depth is temporally regulated in endothelial cells**

476

477 Since p27 is required for flow-mediated endothelial cell quiescence despite very

478 low expression at 72h (Flow-M), we hypothesized that p27 levels temporally fluctuated

479 with flow and found that p27+ cells significantly increased 16h after flow initiation,

480 consistent with another study<sup>45</sup>, and then decreased over time to almost undetectable

481 levels at 72h (**Fig. 5A-B, Supp. Fig. 5A**). Another CIP-KIP family cell cycle inhibitor,

482 p21, showed a similar decrease in expression even earlier in the flow time course (**Fig.**

483 **5A,C, Supp. Fig. 5B**), and Ki67+ cells decreased to almost undetectable levels over

484 flow time (**Fig. 5A,D; Supp. Fig. 5C**), consistent with the conclusion that endothelial

485 cells leave the cell cycle and become quiescent by 16-24h of laminar flow, then

486 subsequently down-regulate p27 levels while maintaining quiescence.

487

488 We then asked whether endothelial cell quiescence depth was temporally

489 regulated under laminar flow. After 16h of flow (flow establishment (Flow-E)), HUVEC

490 only showed significant EdU-labeling and pRB reactivity 8h post-flow, similar to cells

491 released from contact inhibition and longer than the 2h cell cycle reentry time exhibited

492 by cells exposed to homeostatic flow (Flow-M) (**Fig. 5E-G; Supp. Fig. 5D**). HAEC also

493 displayed delayed cell cycle reentry post Flow-E, as measured by EdU+ labeling (**Supp.**

494 **Fig. 5E-F**). These findings correlate with temporal regulation of p27 levels over the flow

495 period and indicate that endothelial cells initially respond to laminar flow with p27

496 upregulation and establishment of a relatively “deep” quiescence (Flow-E) that over time

497 becomes shallower, along with reduced levels of cell cycle inhibitors p27 and p21.

498 Consistent with this idea, endothelial cells were not aligned after 16h flow (Flow-E) but  
499 were aligned by 72h (Flow-M) under our flow conditions (**Supp. Fig. 5G-H**).

500

501 We further analyzed the relationship of endothelial quiescence and p27, via  
502 single-cell image analysis of endothelial cells exposed to Flow-E or high density and  
503 labeled with EdU and p27 reactivity at time points post-flow. Using a threshold for each  
504 label, no EdU+/p27+ cells were observed. With time post-flow, p27+/EdU- cells  
505 increased and then decreased while p27-/EdU+ cells increased, and with release from  
506 contact inhibition similar trends showed that p27+/EdU- cells were replaced by p27-  
507 /EdU+ cells over time (**Fig. Supp. 5I-J**). Functionally, endothelial cells with p27  
508 depletion had elevated EdU labeling after 16h flow (Flow-E) (**Fig. 5H-I**), consistent with  
509 a previous report<sup>45</sup>. These findings indicate that endothelial cell quiescence depth  
510 positively correlates with p27 levels during the transition from deep to shallow  
511 quiescence, and that individual cells with low p27 expression become competent to  
512 reenter the cell cycle.

513

#### 514 **Transcriptional targets of flow-mediated endothelial cell signaling regulate p27** 515 **levels under laminar flow**

516

517 To better understand how endothelial cell p27 may regulate quiescence depth,  
518 we examined genes upregulated by laminar flow whose encoded proteins  
519 transcriptionally repress p27. Both Notch and BMP signaling are upregulated with  
520 laminar flow<sup>2,9,10</sup>, and *HES1* and *ID3* are downstream targets of these pathways that  
521 transcriptionally repress *CDKN1B* expression via direct and indirect promoter

522 interactions<sup>46,47</sup>. Homeostatic flow (Flow-M) led to *HES1* and *ID3* RNA accumulation in  
523 HUVEC (**Supp. Fig. 6A-B**), and depletion of either *HES1* or *ID3* RNA prevented the  
524 normal decrease in p27<sup>+</sup> cells under homeostatic laminar flow (Flow-M) in both HUVEC  
525 and HAEC (**Fig. 6A-B; Supp. Fig. 6C-E**), indicating that these repressors are required  
526 for flow-mediated reduction of p27 levels over time. Notch signaling is required for  
527 endothelial flow-mediated quiescence<sup>45,48</sup>, and consistent with this relationship,  
528 *NOTCH1* or *DLL4* depletion led to increased EdU<sup>+</sup> cells after 16h flow (Flow-E)  
529 compared to control (**Supp. Fig. 6F-G**).

530

531 We hypothesized that *HES1* and *ID3* mediate the temporal changes to  
532 endothelial cell quiescence depth and predicted that *HES1* or *ID3* depletion would  
533 prevent transition from deep to shallow quiescence. *HES1* and *ID3* expression were  
534 significantly increased in cells exposed to Flow-M vs. Flow-E (**Fig. 6C-D**), and either  
535 *HES1* or *ID3* depletion significantly extended the time required for significant increases  
536 in EdU<sup>+</sup> and pRB<sup>+</sup> endothelial cells after Flow-M (**Fig. 6E-J, Supp. Fig. 6H-I**),  
537 suggesting that the normal temporal change to shallow quiescence was prevented  
538 when these p27 repressors were depleted. These findings are consistent with the idea  
539 that endothelial quiescence depth is temporally regulated from deep to shallow over  
540 time in conjunction with laminar flow-mediated changes, and that p27 regulates the  
541 transition downstream of the transcriptional repressors *HES1* and *ID3*.

542

#### 543 **Endothelial cells exposed to venous laminar flow maintain deep quiescence**

544 We asked whether temporal flow-mediated quiescence depth changes depended  
545 on the flow vector (shear stress) magnitude, and we predicted that a lower magnitude of

546 flow characteristic of venous flow would be insufficient to repress p27 levels over time.  
547 In contrast to arterial laminar flow (15d/cm<sup>2</sup>), endothelial cell exposure to venous  
548 laminar flow (5d/cm<sup>2</sup>) for 72h (Flow-MV) did not decrease p27+ cells and had increased  
549 p27 RNA expression over flow time (Flow-EV) (**Fig. 7A-C**). Consistent with p27 levels,  
550 endothelial cells exposed to venous flow required extended time (8h) to significantly  
551 increase EdU+ cells associated with cell cycle reentry (**Fig. 7D-G**) at both 16h (Flow-  
552 EV) and 72h (Flow-MV), indicating that temporal quiescence depth regulation depends  
553 on the magnitude of the flow stimulus.

554

555         Since quiescence depth is linked to p27 levels in flow-exposed cultured cells, and  
556 since flow manipulations are imprecise *in vivo*, we used p27 levels as a proxy for  
557 quiescence depth *in vivo* and hypothesized that venous vs. arterial comparisons would  
558 reveal elevated venous p27 levels. Two endothelial scRNAseq datasets, one from  
559 neonatal mouse skin generated by our lab and one from 24hpf zebrafish generated by  
560 the Sumanas lab<sup>49</sup>, were subjected to UMAP analysis to define artery/vein/capillary  
561 clusters (**Fig. 7H, K**), and we found that *Cdkn1b* (mouse p27 gene) levels trended  
562 higher in venous clusters ( $p = 0.1304$ ) compared to arterial clusters (**Fig. 7I-J**) and were  
563 highly significantly increased in zebrafish venous clusters (**Fig 7L-M**,  $p=0.0001$ ). These  
564 findings show that p27 levels correlate with flow magnitude *in vivo* and suggest that  
565 quiescence depth differs with flow magnitude in arteries vs. veins (**Fig. 8**).

566

567

568 **DISCUSSION**

569           Flow-mediated endothelial cell quiescence is important for vascular homeostasis  
570 and proper barrier function, but how it is set up and maintained is not well-understood.  
571 Here we show that endothelial cell quiescence varies with stimulus and flow magnitude  
572 and is temporally regulated under flow. We also confirm a functional requirement for the  
573 cell cycle inhibitor p27 and find that expression positively correlates with quiescence  
574 depth in cells and varies with flow magnitude *in vivo*. Temporal quiescence depth  
575 changes under arterial flow require flow-regulated p27 repressors that are targets of  
576 flow-mediated pathways such as Notch, suggesting complex regulation of endothelial  
577 cell quiescence depth and a model of quiescence regulation (**Fig. 8**), and they reveal  
578 new critical control points for vascular homeostasis<sup>50–52</sup>.

579  
580           A newly generated endothelial quiescence score tracked well with endothelial  
581 cells made quiescent via contact inhibition or homeostatic laminar flow (Flow-M), and  
582 application of a published quiescence score developed using different cells and  
583 criteria<sup>34</sup> revealed similar trends, indicating that some aspects of vascular quiescence  
584 are shared among cell types and conditions. However, further transcriptome analysis  
585 revealed stimulus-dependent differences in quiescent endothelial cells, and only contact  
586 inhibition broadly stimulated expression of cell cycle inhibitor genes. Further analysis  
587 revealed that most differentially regulated genes were unique to the quiescence  
588 stimulus, and comparison of highly regulated genes supported that transcriptional  
589 profiles are largely unique to the stimulus used to induce quiescence in endothelial  
590 cells, similar to patterns in fibroblasts<sup>18</sup>.



591           Endothelial cells under homeostatic arterial flow (Flow-M) reentered the cell cycle  
592 shortly after flow cessation while contact released cells took significantly longer,  
593 indicating distinct quiescence depths associated with quiescence stimulus. Temporal  
594 analysis revealed that under Flow-M, that simulates arterial levels of shear stress,  
595 endothelial cells first set up a deep quiescence that becomes shallow over flow time,  
596 while under Flow-MV, that simulates venous flow, deep quiescence was established in  
597 the same time frame but not changed over flow time. This provocative finding suggests  
598 that deep quiescence may be important in venous vascular beds that are more poised  
599 to proliferate<sup>53,54</sup>, to prevent inappropriate cell cycle reentry absent an angiogenic  
600 stimulus. It is also in line with a recent study showing that injury-induced collateral  
601 vessel expansion originates from arterial endothelial cells<sup>55</sup>, and that the inverse  
602 correlation of quiescence depth at homeostasis and flow magnitude is linked to  
603 interstitial flow where elevated levels are associated with shallower quiescence in  
604 fibroblasts<sup>56</sup>. Taken together, these findings suggest complex regulation of quiescence  
605 depth relative to flow stimulus.

606

607           Expression of the cell cycle inhibitor p27 positively correlated with quiescence  
608 depth in all scenarios, including between homeostatic Flow-M (p27 levels low) vs.  
609 contact inhibition (p27 levels high)<sup>40</sup>; between arterial Flow-E (establishment) vs. Flow-  
610 M (maintenance) flow times; and between flow magnitude, with lower magnitude  
611 venous-type flow associated with elevated p27 levels and deep quiescence across time.  
612 This strong correlation was mirrored *in vivo*, as p27 expression was elevated in  
613 endothelial cells identified as venous vs. arterial in neonatal mouse ears and zebrafish

614 embryos. We confirmed that p27 is required to establish quiescence in cultured  
615 endothelial cells<sup>45</sup> independent of flow magnitude, and we found that p27 loss leads to  
616 cell cycle mis-regulation and expanded sprouting *in vivo*, indicating that p27 regulates  
617 quiescence establishment and depth in physiological angiogenesis.

618

619         The temporal fluctuations in quiescence depth and p27 levels under arterial flow  
620 link to *HES1* and *ID3*, flow-regulated<sup>9,10</sup> transcriptional repressors of p27<sup>57-59</sup>  
621 downstream of Notch and BMP signaling, respectively. Both repressors are functionally  
622 required non-redundantly to dampen p27 expression as endothelial cells move from  
623 quiescence establishment to maintenance and vascular homeostasis, and their  
624 expression increases with flow time as cells transition from establishment to  
625 maintenance. Quiescence depth under arterial flow is more profound in the absence of  
626 either repressor, suggesting that increased Notch and BMP signaling during  
627 establishment, and subsequent upregulation of these repressors leads to reduced p27  
628 expression levels and a change from a deep to shallow endothelial quiescence depth  
629 **(Fig. 8)**. This model suggests that in addition to p27-mediated cell cycle regulation in  
630 early vascular development to promote arterio-venous differentiation<sup>45,60</sup>, p27 is  
631 important for subsequent modulation of endothelial quiescence depth.

632

633         What might be an advantage to endothelial cells in a shallow quiescence state  
634 under arterial flow maintenance (homeostasis) conditions? One possibility is protection  
635 from premature permanent arrest, called senescence<sup>61</sup>. Quiescent fibroblasts eventually  
636 undergo senescence<sup>62</sup>, and fibroblast *HES1* expression prevents premature

637 senescence<sup>63</sup>. Senescent arterial endothelial cells often express a senescence-  
638 associated secretory phenotype (SASP)<sup>64</sup> characterized by inflammatory cytokine  
639 expression that contributes to endothelial dysfunction, leading to cardiovascular  
640 disease<sup>65</sup>. Thus, arterial endothelial cells in a shallow quiescence state may be  
641 protected from inappropriate senescence, while the deeper quiescence of venous  
642 endothelial cells may help prevent inappropriate cell cycle reentry. Thus, our findings  
643 that endothelial flow-mediated quiescence regulation is linked to p27 suggest potential  
644 new therapeutic targets for vascular dysfunction.

645

#### 646 **ACKNOWLEDGMENTS**

647

648 We thank members of the Bautch and Cook labs for their support and feedback, the  
649 UNC High Throughput Sequencing Core for technical help, and the UNC Flow  
650 Cytometry Core for FACs sorting. We thank BioRender for figure model generation.

651

#### 652 **AUTHOR CONTRIBUTIONS**

653 Natalie T Tanke (NTT), Jeanette Gowen Cook (JGC), Victoria L Bautch (VLB)  
654 conceptualized the work; NTT, Ziqing Liu (ZL), Michaelanthony T Gore (MTG), Pauline  
655 Bougaran (PB), Allison Marvin (AM), Mary B Linares (MBL), Arya Sharma (AS), Morgan  
656 Oatley (MO), Tianji Yu (TY), Kaitlyn Quigley (KQ), and Sarah Vest (SV) performed and  
657 analyzed experiments. NTT and VLB wrote and edited the manuscript; VLB and JGC  
658 provided study supervision and oversight.

659

660

661

662 **FUNDING**

663

664 This work was supported by grants from the National Institutes of Health (R35

665 HL139950 and GM129074 to VLB), the MiBioX T32 Training Grant (T32 GM 119999-

666 03), a Ruth L. Kirschstein Predoctoral Fellowship (1F31HL156527-01 to NTT), and an

667 American Heart Association Postdoctoral Fellowship (AHA829371 to MO).

668

669 **DECLARATION OF INTERESTS:** none

670

671

672 **REFERENCES**

673

- 674 1. Privratsky JR, Newman PJ. PECAM-1: regulator of endothelial junctional integrity.  
675 *Cell Tissue Res.* 2014;355(3):607-619. doi:10.1007/s00441-013-1779-3
- 676 2. Baeyens N, Schwartz MA. Biomechanics of vascular mechanosensation and  
677 remodeling. *Mol Biol Cell.* 2016;27(1):7-11. doi:10.1091/mbc.E14-11-1522
- 678 3. Sluysmans S, Vasileva E, Spadaro D, Shah J, Rouaud F, Citi S. The role of apical  
679 cell-cell junctions and associated cytoskeleton in mechanotransduction. *Biol Cell.*  
680 2017;109(4):139-161. doi:10.1111/boc.201600075
- 681 4. Levesque MJ, Sprague EA, Schwartz CJ, Nerem RM. The Influence of Shear  
682 Stress on Cultured Vascular Endothelial Cells: The Stress Response of an  
683 Anchorage-Dependent Mammalian Cell. *Biotechnol Prog.* 1989;5(1):1-8.  
684 doi:10.1002/btpr.5420050105
- 685 5. Levesque MJ, Nerem RM, Sprague EA. Vascular endothelial cell proliferation in  
686 culture and the influence of flow. *Biomaterials.* 1990;11(9):702-707.  
687 doi:10.1016/0142-9612(90)90031-k
- 688 6. Ziegler T, Nerem RM. Effect of flow on the process of endothelial cell division.  
689 *Arterioscler Thromb J Vasc Biol.* 1994;14(4):636-643. doi:10.1161/01.atv.14.4.636
- 690 7. Ruter DL, Liu Z, Ngo KM, X S, Marvin A, Buglak DB, Kidder EJ, Bautch VL.  
691 SMAD6 transduces endothelial cell flow responses required for blood vessel  
692 homeostasis. *Angiogenesis.* 2021;24(2):387-398. doi:10.1007/s10456-021-09777-7
- 693 8. Liu Z, Ruter DL, Quigley K, Tanke NT, Jiang Y, Bautch VL. Single-Cell RNA  
694 Sequencing Reveals Endothelial Cell Transcriptome Heterogeneity Under  
695 Homeostatic Laminar Flow. *Arterioscler Thromb Vasc Biol.* 2021;41(10):2575-  
696 2584. doi:10.1161/ATVBAHA.121.316797
- 697 9. Yang J, Li X, Li Y, Southwood M, Ye L, Long L, Al-Lamki RS, Morrell NW. Id  
698 proteins are critical downstream effectors of BMP signaling in human pulmonary  
699 arterial smooth muscle cells. *Am J Physiol - Lung Cell Mol Physiol.*  
700 2013;305(4):L312-L321. doi:10.1152/ajplung.00054.2013
- 701 10. Jouve C, Palmeirim I, Henrique D, Beckers J, Gossler A, Ish-Horowicz D, Pourquie  
702 O. Notch signalling is required for cyclic expression of the hairy-like gene HES1 in  
703 the presomitic mesoderm. *Development.* 2000;127(7):1421-1429.  
704 doi:10.1242/dev.127.7.1421
- 705 11. Caplan BA, Schwartz CJ. Increased endothelial cell turnover in areas of in vivo  
706 Evans Blue uptake in the pig aorta. *Atherosclerosis.* 1973;17(3):401-417.  
707 doi:10.1016/0021-9150(73)90031-2

- 708 12. Schlereth K, Weichenhan D, Bauer T, Heumann T, Giannakouri E, Lipka D, Jaeger  
709 S, Schlesner M, Aloy P, Eils R, Plass C, Augustin HG. The transcriptomic and  
710 epigenetic map of vascular quiescence in the continuous lung endothelium. *eLife*.  
711 2018;7:e34423. doi:10.7554/eLife.34423
- 712 13. Millauer B, Wizigmann-Voos S, Schnürch H, Martinez R, Møller NPH, Risau W,  
713 Ullrich A. High affinity VEGF binding and developmental expression suggest Flk-1  
714 as a major regulator of vasculogenesis and angiogenesis. *Cell*. 1993;72(6):835-  
715 846. doi:10.1016/0092-8674(93)90573-9
- 716 14. Gerhardt H, Golding M, Fruttiger M, Ruhrberg C, Lundkvist A, Abramsson A,  
717 Jeltsch M, Mitchell C, Alitalo K, Shima D, Betsholtz C. VEGF guides angiogenic  
718 sprouting utilizing endothelial tip cell filopodia. *J Cell Biol*. 2003;161(6):1163-1177.  
719 doi:10.1083/jcb.200302047
- 720 15. Bernatchez PN, Soker S, Sirois MG. Vascular Endothelial Growth Factor Effect on  
721 Endothelial Cell Proliferation, Migration, and Platelet-activating Factor Synthesis Is  
722 Flk-1-dependent \*. *J Biol Chem*. 1999;274(43):31047-31054.  
723 doi:10.1074/jbc.274.43.31047
- 724 16. Min M, Spencer SL. Spontaneously slow-cycling subpopulations of human cells  
725 originate from activation of stress-response pathways. *PLoS Biol*.  
726 2019;17(3):e3000178. doi:10.1371/journal.pbio.3000178
- 727 17. Johnson MS, Cook JG. Cell cycle exits and U-turns: Quiescence as multiple  
728 reversible forms of arrest. *Fac Rev*. 2023;12:5. doi:10.12703/r/12-5
- 729 18. Coller HA, Sang L, Roberts JM. A New Description of Cellular Quiescence. *PLOS*  
730 *Biol*. 2006;4(3):e83. doi:10.1371/journal.pbio.0040083
- 731 19. Hartwell LH, Culotti J, Pringle JR, Reid BJ. Genetic Control of the Cell Division  
732 Cycle in Yeast. *Science*. 1974;183(4120):46-51. doi:10.1126/science.183.4120.46
- 733 20. Tarn WY, Lai MC. Translational control of cyclins. *Cell Div*. 2011;6:5.  
734 doi:10.1186/1747-1028-6-5
- 735 21. Minshull J, Pines J, Golsteyn R, Standart N, Mackie S, Colman A, Blow J,  
736 Ruderman JV, Wu M, Hunt T. The role of cyclin synthesis, modification and  
737 destruction in the control of cell division. *J Cell Sci*. 1989;1989(Supplement\_12):77-  
738 97. doi:10.1242/jcs.1989.Supplement\_12.8
- 739 22. Kwon JS, Everetts NJ, Wang X, Wang W, Croce KD, Xing J, Yao G. Controlling  
740 Depth of Cellular Quiescence by an Rb-E2F Network Switch. *Cell Rep*.  
741 2017;20(13):3223-3235. doi:10.1016/j.celrep.2017.09.007
- 742 23. Fujimaki K, Li R, Chen H, Croce KD, Zhang HH, Xing J, Bai F, Yao G. Graded  
743 regulation of cellular quiescence depth between proliferation and senescence by a

- 744 lysosomal dimmer switch. *Proc Natl Acad Sci*. Published online October 21, 2019.  
745 doi:10.1073/pnas.1915905116
- 746 24. Rodgers JT, King KY, Brett JO, Cromie MJ, Charville GW, Maguire KK, Brunson C,  
747 Mastey N, Liu L, Tsai CR, Goodell MA, Rando TA. mTORC1 controls the adaptive  
748 transition of quiescent stem cells from G0 to GAlert. *Nature*. 2014;510(7505):393-  
749 396. doi:10.1038/nature13255
- 750 25. Min M, Rong Y, Tian C, Spencer SL. Temporal integration of mitogen history in  
751 mother cells controls proliferation of daughter cells. *Science*. 2020;368(6496):1261-  
752 1265. doi:10.1126/science.aay8241
- 753 26. Schindelin J, Arganda-Carreras I, Frise E, Kaynig V, Longair M, Pietzsch T,  
754 Preibisch S, Rueden C, Saalfeld S, Schmid B, Tinevez JY, White DJ, Hartenstein  
755 V, Eliceiri K, Tomancak P, Cardona A. Fiji: an open-source platform for biological-  
756 image analysis. *Nat Methods*. 2012;9(7):676-682. doi:10.1038/nmeth.2019
- 757 27. Dardik A, Chen L, Frattini J, Asada H, Aziz F, Kudo FA, Sumpio BE. Differential  
758 effects of orbital and laminar shear stress on endothelial cells. *J Vasc Surg*.  
759 2005;41(5):869-880. doi:10.1016/j.jvs.2005.01.020
- 760 28. Liang D, Chang JR, Chin AJ, Smith A, Kelly C, Weinberg ES, Ge R. The role of  
761 vascular endothelial growth factor (VEGF) in vasculogenesis, angiogenesis, and  
762 hematopoiesis in zebrafish development. *Mech Dev*. 2001;108(1):29-43.  
763 doi:10.1016/S0925-4773(01)00468-3
- 764 29. Mahmood T, Yang PC. Western Blot: Technique, Theory, and Trouble Shooting.  
765 *North Am J Med Sci*. 2012;4(9):429-434. doi:10.4103/1947-2714.100998
- 766 30. Buglak DB, Bougaran P, Kulikauskas MR, Liu Z, Monaghan-Benson E, Gold AL,  
767 Marvin AP, Burciu A, Tanke NT, Oatley M, Ricketts SN, Kinghorn K, Johnson BN,  
768 Shiau CE, Rogers S, Guilluy C, Bautch VL. Nuclear SUN1 stabilizes endothelial  
769 cell junctions via microtubules to regulate blood vessel formation. Koh GY,  
770 Akhmanova A, eds. *eLife*. 2023;12:e83652. doi:10.7554/eLife.83652
- 771 31. Dobin A, Davis CA, Schlesinger F, Drenkow J, Zaleski C, Jha S, Batut P, Chaisson  
772 M, Gingeras TR. STAR: ultrafast universal RNA-seq aligner. *Bioinforma Oxf Engl*.  
773 2013;29(1). doi:10.1093/bioinformatics/bts635
- 774 32. Putri GH, Anders S, Pyl PT, Pimanda JE, Zanini F. Analysing high-throughput  
775 sequencing data in Python with HTSeq 2.0. *Bioinforma Oxf Engl*.  
776 2022;38(10):2943-2945. doi:10.1093/bioinformatics/btac166
- 777 33. Love MI, Huber W, Anders S. Moderated estimation of fold change and dispersion  
778 for RNA-seq data with DESeq2. *Genome Biol*. 2014;15(12):550.  
779 doi:10.1186/s13059-014-0550-8

- 780 34. Wiecek AJ, Cutty SJ, Kornai D, Parreno-Centeno M, Gourmet LE, Tagliazucchi  
781 GM, Jacobson DH, Zhang P, Xiong L, Bond GL, Barr AR, Secrier M. Genomic  
782 hallmarks and therapeutic implications of G0 cell cycle arrest in cancer. *Genome*  
783 *Biol.* 2023;24(1):128. doi:10.1186/s13059-023-02963-4
- 784 35. Hoshijima K, Juryneć MJ, Klatt Shaw D, Jacobi AM, Behlke MA, Grunwald DJ.  
785 Highly Efficient CRISPR-Cas9-Based Methods for Generating Deletion Mutations  
786 and F0 Embryos that Lack Gene Function in Zebrafish. *Dev Cell.* 2019;51(5):645-  
787 657.e4. doi:10.1016/j.devcel.2019.10.004
- 788 36. Bresciani E, Broadbridge E, Liu PP. An efficient dissociation protocol for generation  
789 of single cell suspension from zebrafish embryos and larvae. *MethodsX.*  
790 2018;5:1287-1290. doi:10.1016/j.mex.2018.10.009
- 791 37. Pereira PD, Serra-Caetano A, Cabrita M, Bekman E, Braga J, Rino J, Santus R,  
792 Filipe PL, Sousa AE, Ferreira JA. Quantification of cell cycle kinetics by EdU (5-  
793 ethynyl-2'-deoxyuridine)-coupled-fluorescence-intensity analysis. *Oncotarget.*  
794 2017;8(25):40514-40532. doi:10.18632/oncotarget.17121
- 795 38. Goodrich DW, Wang NP, Qian YW, Lee EY, Lee WH. The retinoblastoma gene  
796 product regulates progression through the G1 phase of the cell cycle. *Cell.*  
797 1991;67(2):293-302. doi:10.1016/0092-8674(91)90181-w
- 798 39. Buck SB, Bradford J, Gee KR, Agnew BJ, Clarke ST, Salic A. Detection of S-phase  
799 cell cycle progression using 5-ethynyl-2'-deoxyuridine incorporation with click  
800 chemistry, an alternative to using 5-bromo-2'-deoxyuridine antibodies.  
801 *BioTechniques.* 2008;44(7):927-929. doi:10.2144/000112812
- 802 40. Nosedá M, Chang L, McLean G, Grim JE, Clurman BE, Smith LL, Karsan A. Notch  
803 activation induces endothelial cell cycle arrest and participates in contact inhibition:  
804 role of p21Cip1 repression. *Mol Cell Biol.* 2004;24(20):8813-8822.  
805 doi:10.1128/MCB.24.20.8813-8822.2004
- 806 41. Oesterle EC, Chien WM, Campbell S, Nellimarla P, Fero ML. p27(Kip1) is required  
807 to maintain proliferative quiescence in the adult cochlea and pituitary. *Cell Cycle*  
808 *Georget Tex.* 2011;10(8):1237-1248. doi:10.4161/cc.10.8.15301
- 809 42. Besson A, Gurian-West M, Chen X, Kelly-Spratt KS, Kemp CJ, Roberts JM. A  
810 pathway in quiescent cells that controls p27Kip1 stability, subcellular localization,  
811 and tumor suppression. *Genes Dev.* 2006;20(1):47-64. doi:10.1101/gad.1384406
- 812 43. Levenberg S, Yarden A, Kam Z, Geiger B. p27 is involved in N-cadherin-mediated  
813 contact inhibition of cell growth and S-phase entry. *Oncogene.* 1999;18(4):869-876.  
814 doi:10.1038/sj.onc.1202396
- 815 44. Miller I, Min M, Yang C, Tian C, Gookin S, Carter D, Spencer SL. Ki67 is a Graded  
816 Rather than a Binary Marker of Proliferation versus Quiescence. *Cell Rep.*  
817 2018;24(5):1105-1112.e5. doi:10.1016/j.celrep.2018.06.110



- 818 45. Fang JS, Coon BG, Gillis N, Chen Z, Qiu J, Chittenden TW, Burt JM, Schwartz MA,  
819 Hirschi KK. Shear-induced Notch-Cx37-p27 axis arrests endothelial cell cycle to  
820 enable arterial specification. *Nat Commun.* 2017;8. doi:10.1038/s41467-017-  
821 01742-7
- 822 46. Chassot AA, Turchi L, Virolle T, Fitsialos G, Batoz M, Deckert M, Dulic V,  
823 Meneguzzi G, Buscà R, Ponzio G. Id3 is a novel regulator of p27kip1 mRNA in  
824 early G1 phase and is required for cell-cycle progression. *Oncogene.*  
825 2007;26(39):5772-5783. doi:10.1038/sj.onc.1210386
- 826 47. Murata K, Hattori M, Hirai N, Shinozuka Y, Hirata H, Kageyama R, Sakai T, Minato  
827 N. Hes1 directly controls cell proliferation through the transcriptional repression of  
828 p27Kip1. *Mol Cell Biol.* 2005;25(10):4262-4271. doi:10.1128/MCB.25.10.4262-  
829 4271.2005
- 830 48. Sun JX, Dou GR, Yang ZY, Liang L, Duan JL, Ruan B, Li MH, Chang TF, Xu XY,  
831 Chen JJ, Wang YS, Yan XC, Han H. Notch activation promotes endothelial  
832 quiescence by repressing MYC expression via miR-218. *Mol Ther Nucleic Acids.*  
833 2021;25:554-566. doi:10.1016/j.omtn.2021.07.023
- 834 49. Gurung S, Restrepo NK, Chestnut B, Klimkaite L, Sumanas S. Single-cell  
835 transcriptomic analysis of vascular endothelial cells in zebrafish embryos. *Sci Rep.*  
836 2022;12(1):13065. doi:10.1038/s41598-022-17127-w
- 837 50. Herrera MD, Mingorance C, Rodríguez-Rodríguez R, Alvarez de Sotomayor M.  
838 Endothelial dysfunction and aging: an update. *Ageing Res Rev.* 2010;9(2):142-152.  
839 doi:10.1016/j.arr.2009.07.002
- 840 51. Seals DR, Jablonkski KL, Donato AJ. Aging and vascular endothelial function in  
841 humans. *Clin Sci Lond Engl 1979.* 2011;120(9):357-375.  
842 doi:10.1042/CS2010047652. Donato AJ, Machin DR, Lesniewski LA.  
843 Mechanisms of Dysfunction in the Aging Vasculature and Role in Age-Related  
844 Disease. *Circ Res.* 2018;123(7):825-848. doi:10.1161/CIRCRESAHA.118.312563
- 845 53. Red-Horse K, Ueno H, Weissman IL, Krasnow MA. Coronary arteries form by  
846 developmental reprogramming of venous cells. *Nature.* 2010;464(7288):549-553.  
847 doi:10.1038/nature08873
- 848 54. Ehling M, Adams S, Benedito R, Adams RH. Notch controls retinal blood vessel  
849 maturation and quiescence. *Dev Camb Engl.* 2013;140(14):3051-3061.  
850 doi:10.1242/dev.093351
- 851 55. Arolkar G, Kumar SK, Wang H, Gonzalez KM, Kumar S, Bishnoi B, Rios Coronado  
852 PE, Woo YJ, Red-Horse K, Das S. Dedifferentiation and Proliferation of Artery  
853 Endothelial Cells Drive Coronary Collateral Development in Mice. *Arterioscler*  
854 *Thromb Vasc Biol.* 2023;43(8):1455-1477. doi:10.1161/ATVBAHA.123.319319

- 855 56. Liu B, Wang X, Jiang L, Xu J, Zohar Y, Yao G. Extracellular Fluid Flow Induces  
856 Shallow Quiescence Through Physical and Biochemical Cues. *Front Cell Dev Biol.*  
857 2022;10:792719. doi:10.3389/fcell.2022.792719
- 858 57. Mack JJ, Mosqueiro TS, Archer BJ, Jones WM, Sunshine H, Faas GC, Briot A,  
859 Aragón RL, Su T, Romay MC, McDonald AI, Kuo CH, Lizama CO, Lane TF, Zovein  
860 AC, Fang Y, Tarling EJ, Vallim TQ de A, Navab M, Fogelman AM, Bouchard LS,  
861 Iruela-Arispe ML. NOTCH1 is a mechanosensor in adult arteries. *Nat Commun.*  
862 2017;8(1):1620. doi:10.1038/s41467-017-01741-8
- 863 58. Helle E, Ampuja M, Antola L, Kivelä R. Flow-Induced Transcriptomic Remodeling of  
864 Endothelial Cells Derived From Human Induced Pluripotent Stem Cells. *Front*  
865 *Physiol.* 2020;11. Accessed April 7, 2023.  
866 <https://www.frontiersin.org/articles/10.3389/fphys.2020.591450>
- 867 59. Zhang MJ, Pisco AO, Darmanis S, Zou J. Mouse aging cell atlas analysis reveals  
868 global and cell type-specific aging signatures. Han JDJ, Tyler JK, Hou L, eds. *eLife.*  
869 2021;10:e62293. doi:10.7554/eLife.62293
- 870 60. Acharya BR, Fang JS, Jeffery ED, Chavkin NW, Genet G, Vasavada H, Nelson EA,  
871 Sheynkman GM, Humphries MJ, Hirschi KK. Connexin 37 sequestering of  
872 activated-ERK in the cytoplasm promotes p27-mediated endothelial cell cycle  
873 arrest. *Life Sci Alliance.* 2023;6(8). doi:10.26508/lsa.202201685
- 874 61. Hayflick L, Moorhead PS. The serial cultivation of human diploid cell strains. *Exp*  
875 *Cell Res.* 1961;25(3):585-621. doi:10.1016/0014-4827(61)90192-6
- 876 62. Marthandan S, Priebe S, Hemmerich P, Klement K, Diekmann S. Long-Term  
877 Quiescent Fibroblast Cells Transit into Senescence. *PLOS ONE.*  
878 2014;9(12):e115597. doi:10.1371/journal.pone.0115597
- 879 63. Sang L, Collier HA, Roberts JM. Control of the reversibility of cellular quiescence by  
880 the transcriptional repressor HES1. *Science.* 2008;321(5892):1095-1100.  
881 doi:10.1126/science.1155998
- 882 64. Han Y, Kim SY. Endothelial senescence in vascular diseases: current  
883 understanding and future opportunities in senotherapeutics. *Exp Mol Med.*  
884 2023;55(1):1-12. doi:10.1038/s12276-022-00906-w
- 885 65. Minamino T, Miyauchi H, Yoshida T, Ishida Y, Yoshida H, Komuro I. Endothelial  
886 Cell Senescence in Human Atherosclerosis. *Circulation.* 2002;105(13):1541-1544.  
887 doi:10.1161/01.CIR.0000013836.85741.17
- 888

889 **Nonstandard Abbreviations and Acronyms**  
890  
891 HUVEC: Human Umbilical Vein Endothelial Cells  
892 HAEC: Human Aortic Endothelial Cells  
893 Flow-M: Flow maintenance; 72 hr 15d/cm<sup>2</sup>  
894 Flow-E: Flow establishment; 16 hr 15d/cm<sup>2</sup>  
895 Flow-EV, Flow establishment venous; 16h, 5d/cm<sup>2</sup>  
896 Flow-MV, Flow maintenance, venous; 16h, 5d/cm<sup>2</sup>  
897 siRNA: Small interfering RNA  
898 KD: Knockdown  
899 A.U.: Arbitrary unit  
900 pRB: Phospho retinoblastoma protein  
901 EdU: 5-Ethynyl-2'-deoxyuridine  
902 *HES1*: Hes Family BHLH Transcription Factor 1  
903 *ID3*: Inhibitor of DNA Binding 3  
904

905 **FIGURE LEGENDS**

906

907 **Figure 1. Laminar flow-mediated quiescence is transcriptionally distinct.**

908 **(A)** Quantification of epithelial quiescence score in HUVEC scRNA dataset by cluster

909 (previously defined<sup>8</sup>). Flow-M, flow maintenance (laminar flow (15d/cm<sup>2</sup>/72h)). Static

910 cells were visually checked for subconfluence and collected 48h post-seeding. **(B)**

911 Quantification of endothelial quiescence score in HUVEC scRNA dataset by cluster. **(C)**

912 Endothelial quiescence score on bulk RNA seq data of HUVEC exposed to indicated

913 stimuli, n= 3 replicates. **(D-E)** Heatmaps showing relative expression of cell cycle

914 proliferation markers (green font) and inhibitors (red font) plotted using bulk RNAseq

915 data of HUVEC under indicated conditions, n=3 replicates. Statistics, one-way ANOVA

916 with Tukey's multiple comparison test.

917

918

919 **Figure 2. Endothelial cell flow maintenance quiescence stimulus leads to shallow**

920 **quiescence depth.**

921 **(A)** Representative images of HUVEC under static (non-flow) or Flow-M (flow

922 maintenance) conditions with EdU incorporation and fixation at indicated times post

923 Flow-M release. Cultures stained for DAPI (white, nuclear mask) and EdU (red, S-

924 phase) or pRB (blue, interphase). Scale bar, 50 μm. White arrow, flow direction. **(B)**

925 Quantification of percent EdU+ cells with indicated conditions. n=3 replicates, 5 images

926 per condition per replicate. **(C)** Quantification of percent pRB+ cells with indicated

927 conditions. n=3 replicates, 5 images per condition per replicate. **(D)** Representative

928 images of HUVEC under indicated density conditions with EdU incorporation and

929 fixation at indicated times post high-density release. Cultures stained for DAPI (white,

930 nuclear mask) and EdU (red, S-phase) or pRB (blue, interphase). Scale bar, 50  $\mu$ m. **(E)**  
931 Quantification of percent EdU+ cells with indicated conditions. n=3 replicates, 6 images  
932 per condition per replicate. **(F)** Quantification of percent pRB+ cells with indicated  
933 conditions. n=3 replicates, 6 images per condition per replicate. Statistics, one-way  
934 ANOVA with Tukey's multiple comparisons test.

935

936

937 **Figure 3. Cell cycle inhibitor p27 expression levels vary with endothelial**

938 **quiescence stimulus.**

939 **(A)** RT-qPCR for *CDKN1B* levels under indicated conditions. n=3 replicates. **(B)**

940 Representative images of HUVEC under indicated conditions stained for p27 (green)

941 and DAPI (white, nuclear mask). Scale bar, 50  $\mu$ m. White arrow, flow direction. **(C)**

942 Quantification of HUVEC p27+ cells under indicated conditions. n=3 replicates, 5

943 images per condition per replicate. **(D)** RT-qPCR for *CDKN1B* levels under indicated

944 conditions. n=3 replicates. **(E)** Representative images of HUVEC under indicated

945 conditions stained for p27 (green) and DAPI (white, nuclear mask). Scale bar, 50  $\mu$ m.

946 **(F)** Quantification of HUVEC p27+ cells under indicated conditions. n=3 replicates, 5

947 images per condition per replicate. Statistics, student's two-tailed *t*-test.

948

949 **Figure 4. p27 establishes quiescence in endothelial cells and regulates cell cycle**

950 **and vascular expansion *in vivo*.**

951 **(A)** Representative images of HUVEC with indicated siRNA treatments and conditions.

952 after EdU incorporation (red, S-phase) and staining with DAPI (white, nuclear mask).

953 Scale bar, 50  $\mu$ m. White arrow, flow direction. **(B)** Quantification of EdU+ cells with

954 indicated conditions. n=3 replicates, 5 images per condition per replicate. **(C-F)** RT-  
955 qPCR of FACs sorted 24 hpf zebrafish endothelial cells from *Tg(fli:LifeAct-GFP)* (green,  
956 endothelial cell marker) embryos of indicated genotypes for *cdkn1bb* **(C)**, *mki67* **(D)**,  
957 *pcna* **(E)**, and *ccnd1* **(F)** levels. n=3 replicates. **(G)** Representative images of 36hpf  
958 *Tg(fli:LifeAct-GFP)* (green, endothelial cell marker) embryos that were also WT or  
959 *cdkn1bb*<sup>-/-</sup>. Yellow arrows, ectopic sprouts. Scale bar, 50 μm. **(H)** Quantification of  
960 ectopic sprouts per embryo. n=3 replicates, 5 images per condition per replicate. **(I)**  
961 Diagram defining regions for ectopic sprout quantification in embryonic zebrafish. **(J)**  
962 Quantification of % ectopic sprouts in *Tg(fli:LifeAct-GFP)* (green, endothelial cell  
963 marker) embryos and of indicated genotypes per region. n=3 replicates, 5 images per  
964 condition per replicate. **(K)** Representative images of 36hpf *Tg(fli:LifeAct-GFP)* embryos  
965 injected with control (NT) or *cdkn1bb* MO at the one-cell stage. Yellow arrows, ectopic  
966 sprouts. Scale bar, 50 μm. **(L)** Quantification of ectopic sprouts per embryo. n=3  
967 replicates, 5 images per condition per replicate. **(M)** Quantification of % ectopic sprouts  
968 in *Tg(fli:LifeAct-GFP)* (green, endothelial cell marker) and with indicated MO injection  
969 per region. n=3 replicates, 5 images per condition per replicate. Statistics, student's two-  
970 tailed *t*-test (C-F, H, L), one-way ANOVA with Tukey's multiple comparisons test (B),  
971 and  $\chi^2$  test (J, M).

972

973

974 **Figure 5. Endothelial quiescence depth varies with laminar flow exposure time**  
975 **and positively correlates with p27 expression levels.**

976 **(A)** Representative images of HUVEC with indicated conditions and stained for p27  
977 (inhibitor), p21 (inhibitor), Ki67 (proliferation marker), and DAPI (nucleus) in white. Scale  
978 bar, 50  $\mu\text{m}$ . White arrow, flow direction. **(B-D)** Quantification of percent p27+ **(B)**, p21+  
979 cells **(C)**, or Ki67+ cells **(D)**. n=3 replicates, 5 images per condition per replicate. **(E)**  
980 Representative images of HUVEC under indicated conditions and after EdU incorporation  
981 (red, S-phase) and stained for pRB (blue, interphase) and with DAPI (white, nuclear  
982 mask), Flow-E, flow establishment (15d/cm<sup>2</sup>, 16h); Flow-M, flow maintenance (15d/cm<sup>2</sup>,  
983 72h). Scale bar, 50  $\mu\text{m}$ . White arrow, flow direction. **(F)** Quantification of EdU+ cells  
984 under indicated conditions. n=3 replicates, 5 images per condition per replicate. **(G)**  
985 Quantification of pRB+ cells under indicated conditions. n=3 replicates, 5 images per  
986 condition per replicate. **(H)** Representative images of HUVEC with indicated siRNA  
987 treatments and conditions after EdU incorporation (red, S-phase) and staining with  
988 DAPI (white, nuclear mask). Scale bar, 50  $\mu\text{m}$ . White arrow, flow direction. **(I)**  
989 Quantification of EdU+ cells with indicated conditions. n=3 replicates, 5 images per  
990 condition per replicate. Statistics, one-way ANOVA with Tukey's multiple comparisons  
991 test.

992

993

994 **Figure 6. BMP and NOTCH regulated p27 repressors *HES1* and *ID3* regulate p27**  
995 **levels and flow-mediated quiescence depth.**

996 **(A)** Representative images of HUVEC under indicated conditions and with indicated  
997 siRNA treatment. Cells stained for p27 (green) and DAPI (white, nuclear mask). Scale  
998 bar, 50  $\mu$ m. White arrow, flow direction. **(B)** Quantification of p27+ cells under indicated  
999 conditions and treatments. n=3 replicates, 5 images per condition per replicate. **(C-D)**  
1000 RT-qPCR for *HES1* **(C)** and *ID3* **(D)** levels under indicated conditions. n=3 replicates.  
1001 **(E)** Representative images of HUVEC under indicated conditions and siRNA treatments.  
1002 Cells were labeled with EdU (red, S-phase) and stained for pRB (blue, interphase) and  
1003 DAPI (white, nuclear mask). Scale bar, 50  $\mu$ m. White arrow, flow direction. **(F)**  
1004 Quantification of EdU+ cells with indicated conditions. n=3 replicates, 5 images per  
1005 condition per replicate. **(G)** Quantification of pRB+ cells with indicated conditions. n=3  
1006 replicates, 5 images per condition per replicate. **(H)** Representative images of HUVEC  
1007 under indicated conditions and siRNA treatments. Cells were labeled with EdU (red, S-  
1008 phase) and stained for pRB (blue, interphase) and DAPI (white, nuclear mask). Scale  
1009 bar, 50  $\mu$ m. White arrow, flow direction. **(I)** Quantification of EdU+ cells under indicated  
1010 conditions. n=3 replicates, 5 images per condition per replicate. **(J)** Quantification of  
1011 pRB+ cells under indicated conditions. n=3 replicates, 5 images per condition per  
1012 replicate. Statistics, student's two-tailed *t*-test (C-D) and one-way ANOVA with Tukey's  
1013 multiple comparisons test (B, F-G, I-J).

1014

1015

1016



1017 **Figure 7. Endothelial cells establish and maintain deep quiescence under venous**  
1018 **flow and express elevated p27 levels *in vivo*.**

1019 **(A)** Representative images of HUVEC under indicated conditions (Flow-MV (5d/cm<sup>2</sup>,  
1020 72h)) stained for p27 (green) and DAPI (white, nuclear mask). Scale bar, 50 μm. White  
1021 arrow, flow direction. **(B)** Quantification of HUVEC p27+ cells under indicated  
1022 conditions, n=3 replicates, 5 images per condition per replicate. **(C)** RT-qPCR for  
1023 *CDKN1B* levels in indicated conditions. n=3 replicates. **(D)** Representative images of  
1024 HUVEC under static (non-flow) or Flow-EV (5d/cm<sup>2</sup>, 16h) conditions with EdU  
1025 incorporation and fixation at indicated times post Flow-EV release. Cells stained for  
1026 DAPI (white, nuclear mask) and EdU (red, S-phase), Scale bar, 50 μm. White arrow,  
1027 flow direction. **(E)** Quantification of EdU+ cells with indicated conditions. n=3 replicates,  
1028 5 images per condition per replicate. **(F)** Representative images of HUVEC under static  
1029 (non-flow) or Flow-MV conditions (5d/cm<sup>2</sup>, 72h) with EdU incorporation and fixation at  
1030 indicated times post Flow-MV release. Cells stained for DAPI (white, nuclear mask) and  
1031 EdU (red, S-phase), Scale bar, 50 μm. White arrow, flow direction. **(G)** Quantification of  
1032 EdU+ cells with indicated conditions. n=3 replicates, 5 images per condition per  
1033 replicate. **(H)** UMAP grouping of artery, vein, and capillary endothelial cell clusters  
1034 enriched from neonatal mouse ear skin. **(I)** UMAP overlaid with *Cdkn1b* (p27)  
1035 expression. **(J)** Dot plot of *Cdkn1b* expression by endothelial sub-type. **(K)** UMAP  
1036 grouping of endothelial artery, vein, and capillary clusters reanalyzed from 24hpf  
1037 embryonic zebrafish. **(L)** UMAP overlaid with *cdkn1bb* (p27) expression. **(M)** Dot plot of  
1038 *Cdkn1b* expression by endothelial sub-type. Statistics, student's two-tailed *t*-test (B-C,  
1039 J-M) and one-way ANOVA with Tukey's multiple comparisons test (E, G).

1040 **Figure 8. Model of endothelial cell flow-mediated quiescence depth.**

1041 Proposed model for dynamic regulation of endothelial cell flow-mediated quiescence  
1042 depth with flow exposure time and magnitude. In the first 16h (Flow-E, arterial flow  
1043 establishment) of laminar flow, a deep quiescence is established accompanied by high  
1044 levels of cell cycle inhibitor p27, independent of flow magnitude. With time under arterial  
1045 flow (Flow-M, flow maintenance), *HES1* and *ID3* transcription factors are upregulated  
1046 downstream of flow-mediated Notch and BMP signaling, and they repress p27  
1047 transcription leading to a shallow quiescence depth. Deep quiescence and high p27  
1048 levels characterize venous flow establishment at 16h (Flow-EV, venous flow  
1049 establishment), and this deep quiescence perdures with time under venous flow (Flow-  
1050 MV).

1051

1052 **SUPPLEMENTARY FIGURE LEGENDS**

1053

1054 **Supplemental Figure 1. Endothelial cell quiescence transcriptional profiles are**  
1055 **stimulus-dependent.**

1056 **(A)** Quantification using an epithelial quiescence score<sup>34</sup> on HUVEC bulk RNAseq  
1057 dataset under different conditions. n=3 replicates. Flow-M, flow maintenance (15d/cm<sup>2</sup>,  
1058 72h). **(B)** Venn diagrams showing bulk RNA seq analysis of genes up- and down-  
1059 regulated in HUVEC under indicated conditions. **(C-F)** Heatmaps showing relative  
1060 expression levels of differentially regulated genes (top 50 by fold change and p-value) in  
1061 bulk RNA seq from HUVEC under indicated conditions. Statistics, one-way ANOVA with  
1062 Tukey's multiple comparisons test.

1063

1064 **Supplemental Figure 2. Quiescence depth is replicated in HAEC (human arterial**  
1065 **endothelial cells).**

1066 **(A)** Schematic showing areas of scratch wound used for imaging post-scratch for  
1067 contact inhibition quiescence depth experiments. **(B)** Quantification of HUVEC pRB  
1068 nuclear fluorescence intensity under indicated conditions. n=3 replicates, 5 images  
1069 averaged per condition per replicate. **(C)** Quantification of HUVEC nuclear fluorescence  
1070 intensity of pRB in low vs. high density release timepoints. n=3 replicates, 5 averaged  
1071 images per condition per replicate. **(D)** Representative images of HAEC under static  
1072 (non-flow) or Flow-M (flow maintenance) conditions with EdU incorporation and fixation  
1073 at indicated times post Flow-M release. Cells stained for DAPI (white, nuclear mask)  
1074 and EdU (red, S-phase). Scale bar, 50  $\mu$ m. White arrow, flow direction. **(E)**  
1075 Quantification of percent EdU+ cells with indicated conditions. n=3 replicates, 5 images  
1076 per condition per replicate. **(F)** Representative images of HAEC under indicated density  
1077 conditions with EdU incorporation and fixation at indicated times post density release.  
1078 Cells stained for DAPI (white, nuclear mask) and EdU (red, S-phase). Scale bar, 50  $\mu$ m.  
1079 **(G)** Quantification of percent EdU+ cells with indicated conditions. n=3 replicates, 5  
1080 images per condition per replicate. Statistics, one-way ANOVA with Tukey's multiple  
1081 comparisons test.

1082  
1083 **Supplemental Figure 3. Cell cycle inhibitor p27 expression differs with**  
1084 **quiescence stimulus.**

1085  
1086 **(A)** Quantification of p27 nuclear fluorescence intensity in indicated conditions. n=3  
1087 replicates, 5 images averaged per condition per replicate. **(B)** Quantification of p27

1088 nuclear fluorescence intensity in indicated conditions. n=3 replicates, 5 images  
1089 averaged per condition per replicate. **(C)** Western blot of p27 expression under  
1090 indicated conditions, and with indicated antibodies. p27 Ab #1 (Cell Signaling) and p27  
1091 Ab #2 (Santa Cruz). **(D)** Representative images of HAEC under indicated conditions  
1092 stained for p27 (green) and DAPI (white, nuclear mask). Scale bar, 50  $\mu$ m. White arrow,  
1093 flow direction. **(E)** Quantification of HAEC p27+ cells under indicated conditions, n=3  
1094 replicates, 5 images per condition per replicate. **(F)** Representative images of HUVEC  
1095 with indicated siRNA and treatments. Endothelial cells stained with Ki67 (yellow,  
1096 proliferation marker) and DAPI (gray, nucleus mask). Scale bar 50  $\mu$ m. White arrow,  
1097 flow direction. **(G)** Quantification of percent Ki67+ cells. n=3 replicates, 5 images per  
1098 condition per replicate. **(H)** Quantification of nuclear fluorescence intensity of Ki67. n=3  
1099 replicates, 5 averaged images per condition per replicate. Statistics, student's two-tailed  
1100 *t*-test (A-B, E) and one-way ANOVA with Tukey's multiple comparisons test (G-H).

1101

1102 **Supplemental Figure 4. p27 depletion leads to distinct transcriptional changes**  
1103 **dependent on quiescence stimulus.**

1104 **(A)** Venn diagrams showing overlap of HUVEC genes differentially regulated in  
1105 indicated conditions and for *CDKN1B* KD compared to NT. **(B-E)** Heatmaps showing  
1106 relative expression levels of genes differentially regulated (top 50 by fold change and p-  
1107 value) in response to indicated conditions. **(F-I)** GO analysis performed on differentially  
1108 expressed genes from bulk RNA-seq data comparing indicated conditions/treatments.  
1109 Representative biological processes GO terms significantly enriched (P adjusted < 0.1)  
1110 in differentially regulated genes are shown.

1111 **Supplemental Figure 5. Cell cycle inhibitor and Ki67 expression intensity varies**  
1112 **with flow and correlates with flow-mediated endothelial cell alignment.**  
1113 **(A)** Quantification of p27 nuclear fluorescence intensity under indicated conditions. n=3  
1114 replicates, 5 averaged images per condition per replicate. **(B)** Quantification of p21  
1115 nuclear fluorescence intensity under indicated conditions. n=3 replicates, 5 averaged  
1116 images per condition per replicate. **(C)** Quantification of Ki67 nuclear fluorescence  
1117 intensity under indicated conditions. n=3 replicates, 5 averaged images per condition  
1118 per replicate. **(D)** Quantification of pRB nuclear fluorescence intensity under indicated  
1119 conditions. n=3 replicates, 5 averaged images per condition per replicate. **(E)**  
1120 Representative images of HAEC under static (non-flow) or Flow-E conditions with EdU  
1121 incorporation and fixation at indicated times post Flow-E release. Cells stained for DAPI  
1122 (white, nuclear mask) and EdU (red, S-phase), Scale bar, 50  $\mu$ m. White arrow, flow  
1123 direction. **(F)** Quantification of EdU+ cells under indicated conditions. n=3 replicates, 5  
1124 images per condition per replicate. **(G)** Representative images of HUVEC stained with  
1125 VE-cadherin (white, junction marker) and DAPI (blue, nucleus) under indicated  
1126 conditions. Scale bar, 50  $\mu$ m. White arrow, flow direction. **(H)** Cell axis ratio  
1127 quantification under indicated conditions. n=3 replicates, 5 images per condition per  
1128 replicate. **(I)** % HUVEC under Flow-E release with p27-/EdU-, p27+/EdU-, and p27-  
1129 /EdU+ incorporation. **(J)** % HUVEC under high density release with p27-/EdU-,  
1130 p27+/EdU-, and p27-/EdU+ incorporation. Statistics, one-way ANOVA with Tukey's  
1131 multiple comparisons test (A-D, F, H) and  $X^2$  test (I-J).  
1132

1133 **Supplemental Figure 6. Nuclear fluorescence intensity of markers and changes**  
1134 **with *HES1* or *ID3* depletion.**

1135 **(A)** RT-qPCR for *HES1* expression under indicated conditions. n=3 replicates. **(B)** RT-  
1136 qPCR for *ID3* expression under indicated conditions, n=3 replicates. **(C)** Quantification  
1137 of p27 nuclear fluorescence intensity with indicated siRNA treatments and conditions.  
1138 n=3 replicates, 5 averaged images per condition per replicate. **(D)** Representative  
1139 images of HAEC under indicated conditions and with indicated siRNA treatment. Cells  
1140 stained for p27 (green) and DAPI (white, nuclear mask). Scale bar, 50  $\mu$ m. White arrow,  
1141 flow direction. **(E)** Quantification of p27+ cells under indicated conditions and  
1142 treatments. n=3 replicates, 5 images per condition per replicate. **(F)** Representative  
1143 images of HUVEC under indicated conditions and siRNA treatments. Cells were labeled  
1144 with EdU (red, S-phase) and stained for DAPI (white, nuclear mask). Scale bar, 50  $\mu$ m.  
1145 White arrow, flow direction. **(G)** Quantification of EdU+ cells with indicated conditions.  
1146 n=3 replicates, 5 images per condition per replicate. **(H)** Quantification of pRB nuclear  
1147 fluorescence intensity under indicated siRNA treatments and conditions. n=3 replicates,  
1148 5 averaged images per condition per replicate. **(I)** Quantification of pRB nuclear  
1149 fluorescence intensity under indicated siRNA treatments and conditions. n=3 replicates,  
1150 5 averaged images per condition per replicate. Statistics, student's two tailed t-test (A-  
1151 B) and one-way ANOVA with Tukey's multiple comparisons test (C, E, G-I).

1152

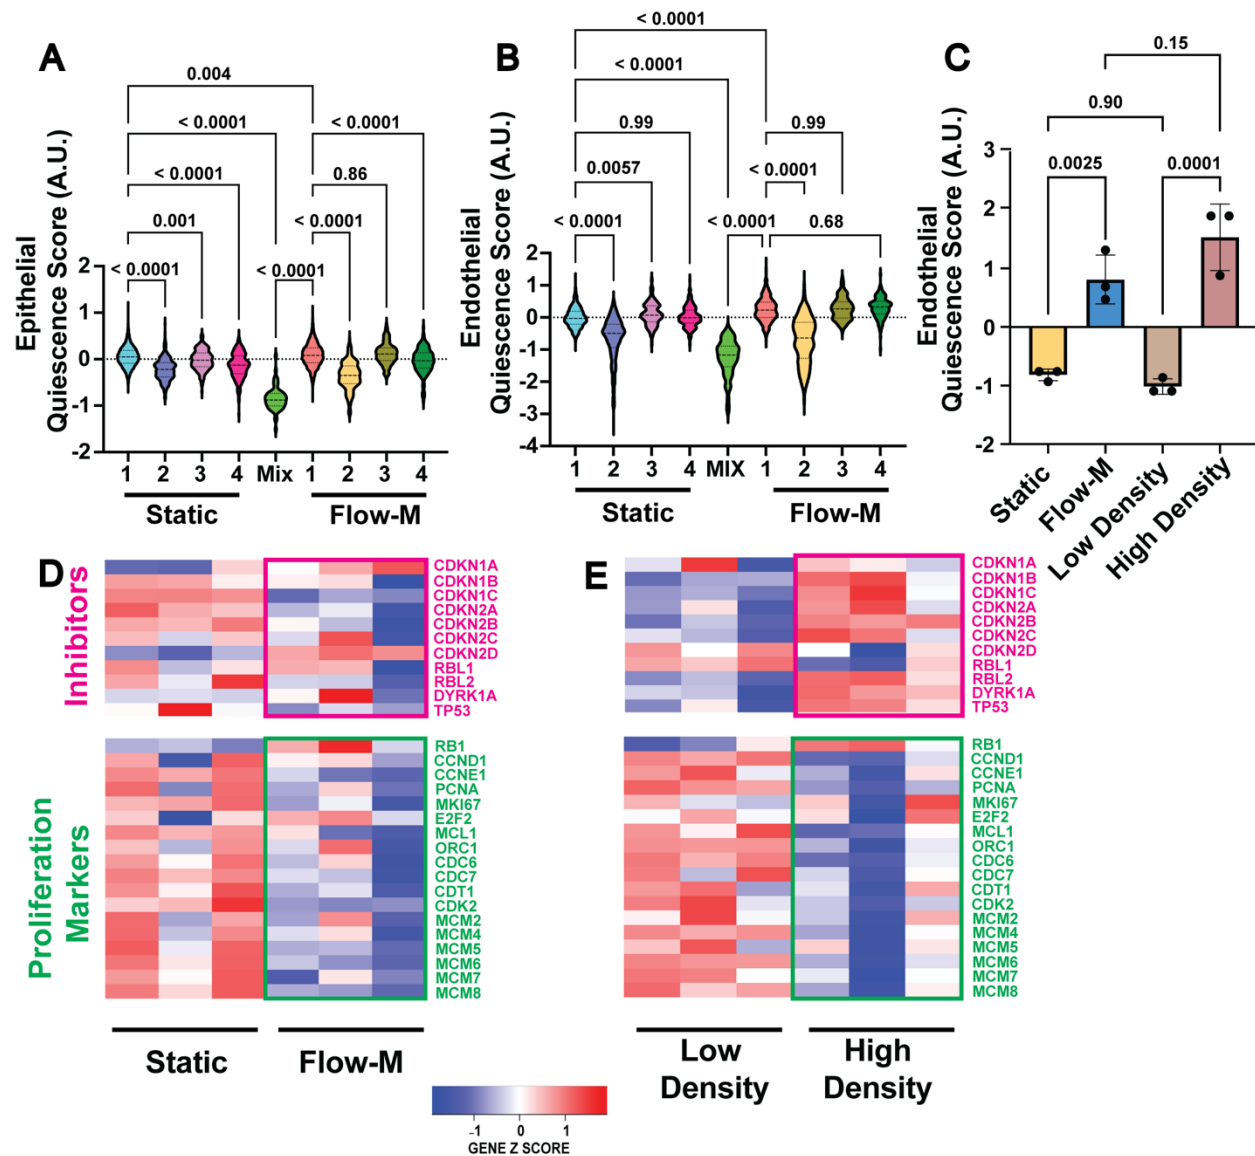

**Figure 1. Lamellar flow-mediated quiescence is transcriptionally distinct.**

(A) Quantification of epithelial quiescence score in HUVEC scRNA dataset by cluster (previously defined<sup>8</sup>). Flow-M, flow maintenance (laminar flow (15d/cm<sup>2</sup>/72h)). Static cells were visually checked for subconfluence and collected 48h post-seeding. (B) Quantification of endothelial quiescence score in HUVEC scRNA dataset by cluster. (C) Endothelial quiescence score on bulk RNA seq data of HUVEC exposed to indicated stimuli, n= 3 replicates. (D-E) Heatmaps showing relative expression of cell cycle proliferation markers (green font) and inhibitors (red font) plotted using bulk RNAseq data of HUVEC under indicated conditions, n=3 replicates. Statistics, one-way ANOVA with Tukey's multiple comparison test.

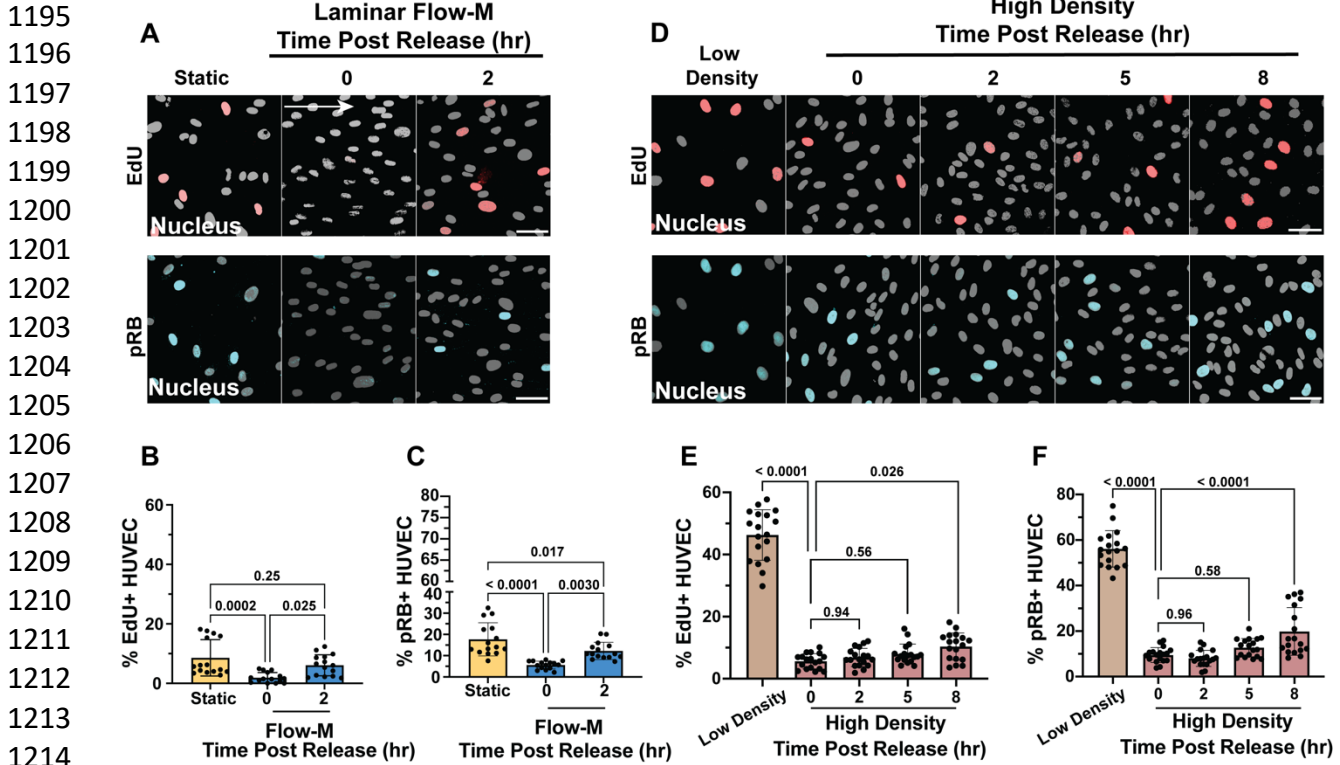

**Figure 2. Endothelial cell flow maintenance quiescence stimulus leads to shallow quiescence depth.**

**(A)** Representative images of HUVEC under static (non-flow) or Flow-M (flow maintenance) conditions with EdU incorporation and fixation at indicated times post Flow-M release. Cultures stained for DAPI (white, nuclear mask) and EdU (red, S-phase) or pRB (blue, interphase). Scale bar, 50  $\mu$ m. White arrow, flow direction. **(B)** Quantification of percent EdU+ cells with indicated conditions.  $n=3$  replicates, 5 images per condition per replicate. **(C)** Quantification of percent pRB+ cells with indicated conditions.  $n=3$  replicates, 5 images per condition per replicate. **(D)** Representative images of HUVEC under indicated density conditions with EdU incorporation and fixation at indicated times post high-density release. Cultures stained for DAPI (white, nuclear mask) and EdU (red, S-phase) or pRB (blue, interphase). Scale bar, 50  $\mu$ m. **(E)** Quantification of percent EdU+ cells with indicated conditions.  $n=3$  replicates, 6 images per condition per replicate. **(F)** Quantification of percent pRB+ cells with indicated conditions.  $n=3$  replicates, 6 images per condition per replicate. Statistics, one-way ANOVA with Tukey's multiple comparisons test.



1233  
1234  
1235  
1236  
1237  
1238  
1239  
1240  
1241  
1242  
1243  
1244  
1245  
1246  
1247  
1248  
1249  
1250  
1251  
1252  
1253  
1254  
1255  
1256  
1257  
1258  
1259  
1260  
1261  
1262  
1263  
1264  
1265  
1266  
1267  
1268  
1269  
1270  
1271  
1272  
1273  
1274

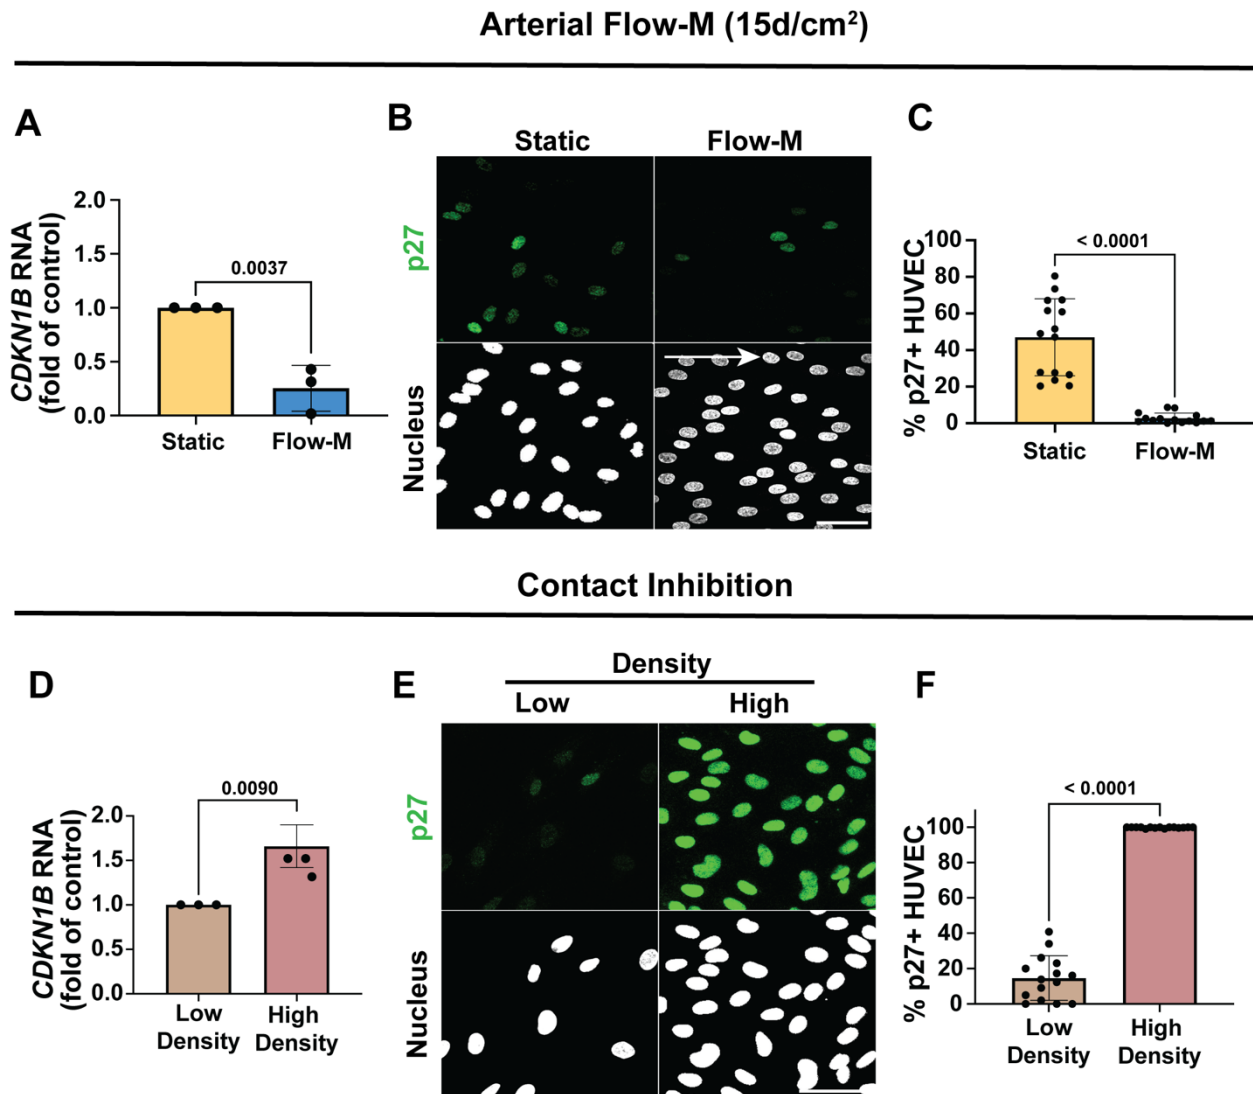

**Figure 3. Cell cycle inhibitor p27 expression levels vary with endothelial quiescence stimulus.**

**(A)** RT-qPCR for *CDKN1B* levels under indicated conditions. n=3 replicates. **(B)** Representative images of HUVEC under indicated conditions stained for p27 (green) and DAPI (white, nuclear mask). Scale bar, 50  $\mu$ m. White arrow, flow direction. **(C)** Quantification of HUVEC p27+ cells under indicated conditions. n=3 replicates, 5 images per condition per replicate. **(D)** RT-qPCR for *CDKN1B* levels under indicated conditions. n=3 replicates. **(E)** Representative images of HUVEC under indicated conditions stained for p27 (green) and DAPI (white, nuclear mask). Scale bar, 50  $\mu$ m. **(F)** Quantification of HUVEC p27+ cells under indicated conditions. n=3 replicates, 5 images per condition per replicate. Statistics, student's two-tailed *t*-test.

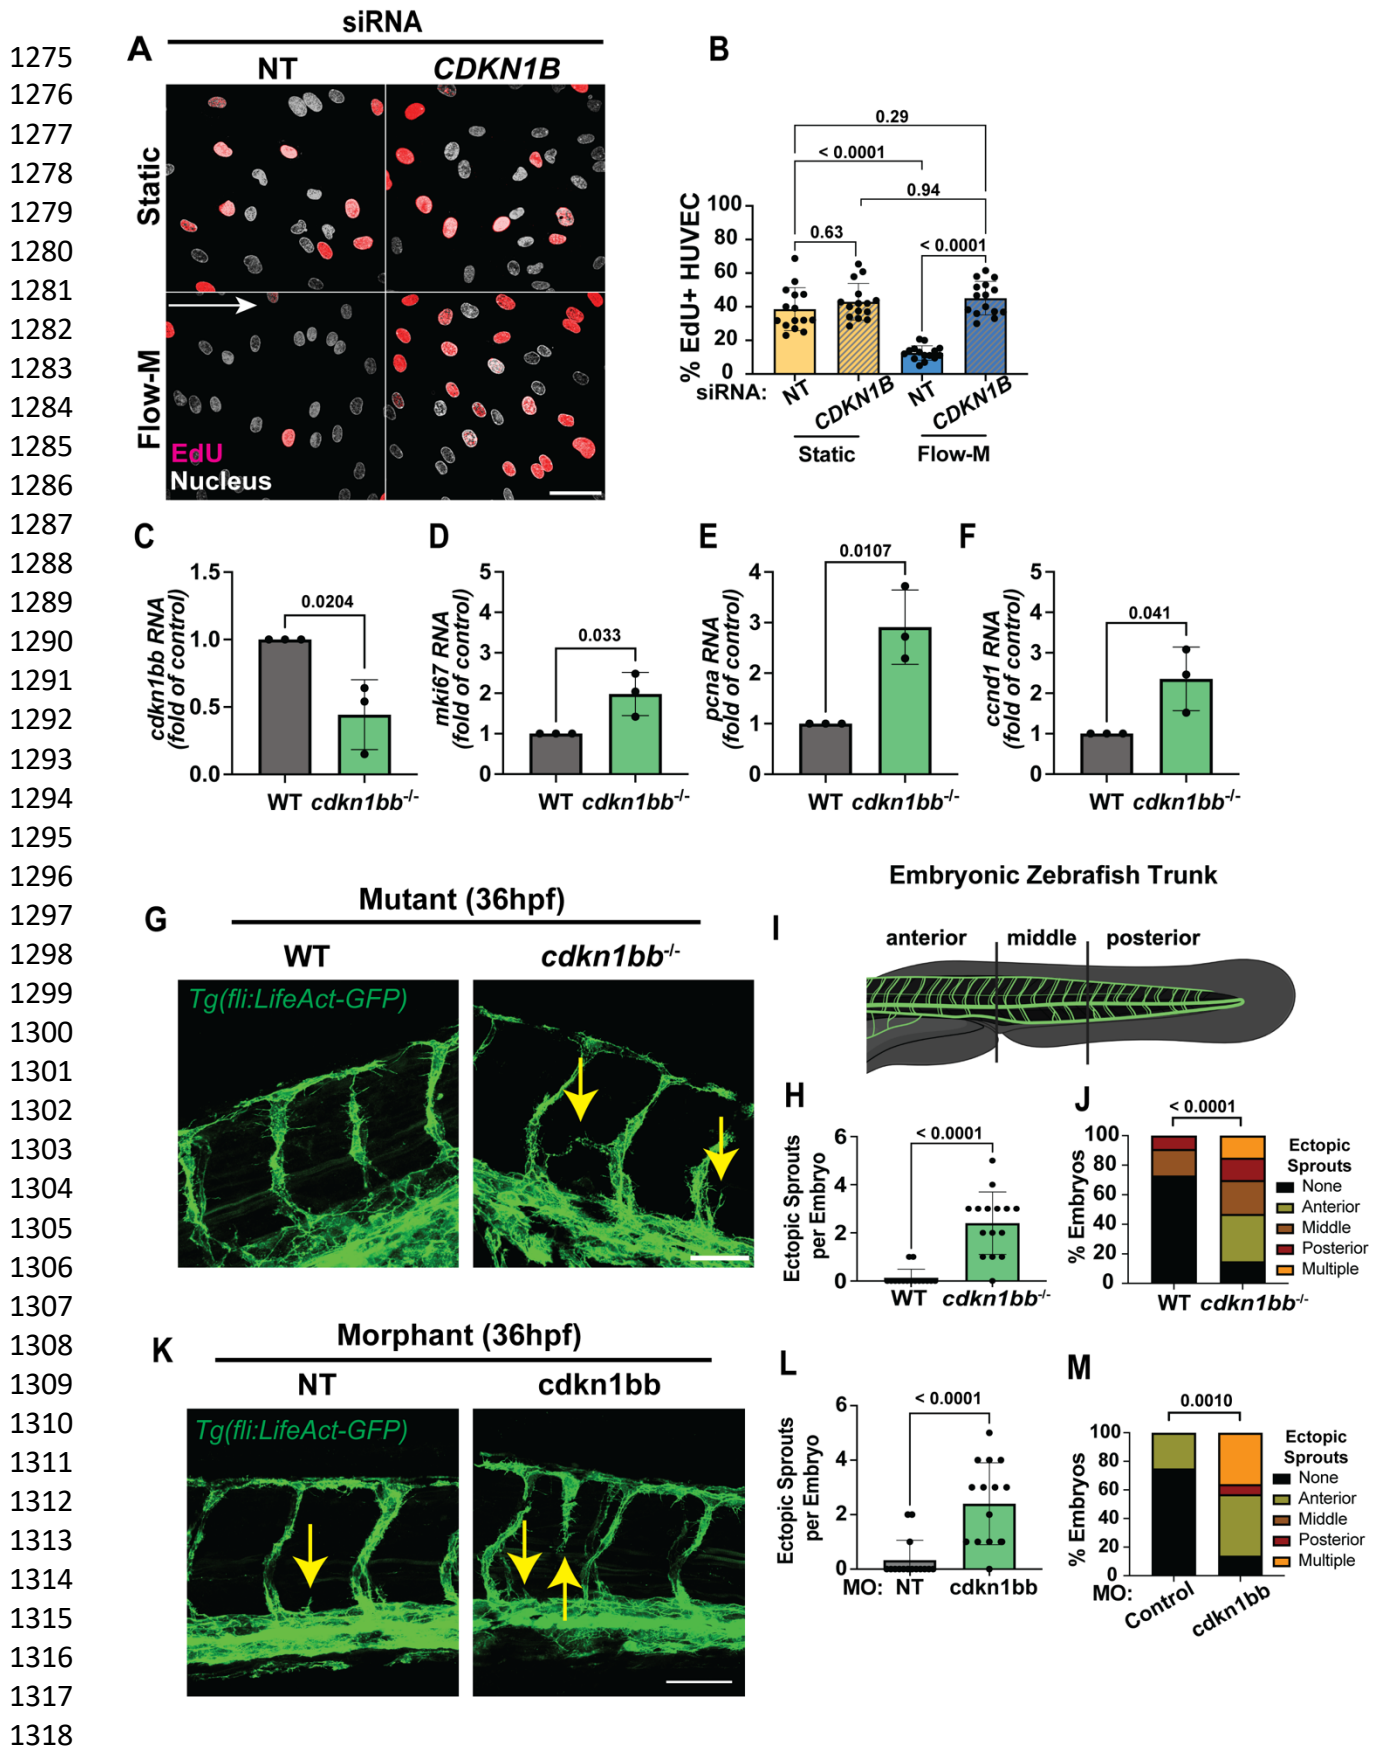

1319 **Figure 4. p27 establishes quiescence in endothelial cells and regulates cell cycle**  
1320 **and vascular expansion *in vivo*.**

1321 **(A)** Representative images of HUVEC with indicated siRNA treatments and conditions.  
1322 after EdU incorporation (red, S-phase) and staining with DAPI (white, nuclear mask).  
1323 Scale bar, 50  $\mu$ m. White arrow, flow direction. **(B)** Quantification of EdU+ cells with  
1324 indicated conditions. n=3 replicates, 5 images per condition per replicate. **(C-F)** RT-  
1325 qPCR of FACs sorted 24 hpf zebrafish endothelial cells from *Tg(fli:LifeAct-GFP)* (green,  
1326 endothelial cell marker) embryos of indicated genotypes for *cdkn1bb* **(C)**, *mki67* **(D)**,  
1327 *pcna* **(E)**, and *ccnd1* **(F)** levels. n=3 replicates. **(G)** Representative images of 36hpf  
1328 *Tg(fli:LifeAct-GFP)* (green, endothelial cell marker) embryos that were also WT or  
1329 *cdkn1bb*<sup>-/-</sup>. Yellow arrows, ectopic sprouts. Scale bar, 50  $\mu$ m. **(H)** Quantification of  
1330 ectopic sprouts per embryo. n=3 replicates, 5 images per condition per replicate. **(I)**  
1331 Diagram defining regions for ectopic sprout quantification in embryonic zebrafish. **(J)**  
1332 Quantification of % ectopic sprouts in *Tg(fli:LifeAct-GFP)* (green, endothelial cell  
1333 marker) embryos and of indicated genotypes per region. n=3 replicates, 5 images per  
1334 condition per replicate. **(K)** Representative images of 36hpf *Tg(fli:LifeAct-GFP)* embryos  
1335 injected with control (NT) or *cdkn1bb* MO at the one-cell stage. Yellow arrows, ectopic  
1336 sprouts. Scale bar, 50  $\mu$ m. **(L)** Quantification of ectopic sprouts per embryo. n=3  
1337 replicates, 5 images per condition per replicate. **(M)** Quantification of % ectopic sprouts  
1338 in *Tg(fli:LifeAct-GFP)* (green, endothelial cell marker) and with indicated MO injection  
1339 per region. n=3 replicates, 5 images per condition per replicate. Statistics, student's two-  
1340 tailed *t*-test (C-F, H, L), one-way ANOVA with Tukey's multiple comparisons test (B),  
1341 and  $C^2$  test (J, M).  
1342

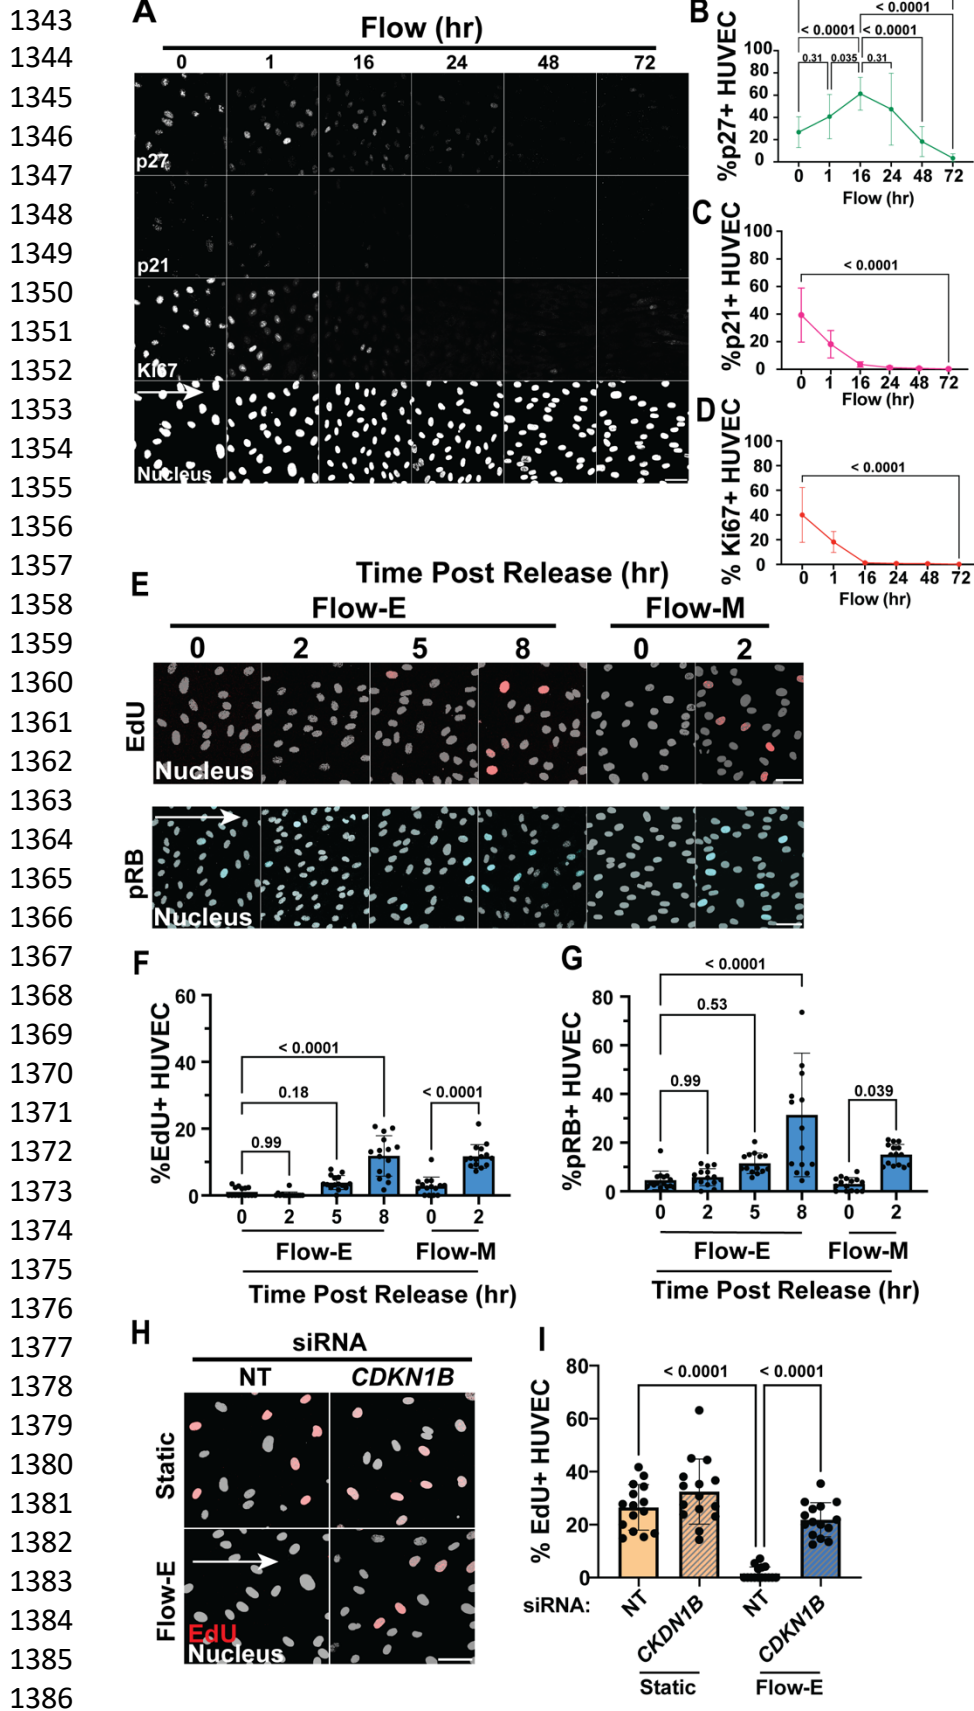

1387 **Figure 5. Endothelial quiescence depth varies with laminar flow exposure time**  
1388 **and positively correlates with p27 expression levels.**

1389 **(A)** Representative images of HUVEC with indicated conditions and stained for p27  
1390 (inhibitor), p21 (inhibitor), Ki67 (proliferation marker), and DAPI (nucleus) in white. Scale  
1391 bar, 50  $\mu\text{m}$ . White arrow, flow direction. **(B-D)** Quantification of percent p27+ **(B)**, p21+  
1392 cells **(C)**, or Ki67+ cells **(D)**. n=3 replicates, 5 images per condition per replicate. **(E)**  
1393 Representative images of HUVEC under indicted conditions and after EdU incorporation  
1394 (red, S-phase) and stained for pRB (blue, interphase) and with DAPI (white, nuclear  
1395 mask), Flow-E, flow establishment (15d/cm<sup>2</sup>, 16h); Flow-M, flow maintenance (15d/cm<sup>2</sup>,  
1396 72h). Scale bar, 50  $\mu\text{m}$ . White arrow, flow direction. **(F)** Quantification of EdU+ cells  
1397 under indicated conditions. n=3 replicates, 5 images per condition per replicate. **(G)**  
1398 Quantification of pRB+ cells under indicated conditions. n=3 replicates, 5 images per  
1399 condition per replicate. **(H)** Representative images of HUVEC with indicated siRNA  
1400 treatments and conditions after EdU incorporation (red, S-phase) and staining with  
1401 DAPI (white, nuclear mask). Scale bar, 50  $\mu\text{m}$ . White arrow, flow direction. **(I)**  
1402 Quantification of EdU+ cells with indicated conditions. n=3 replicates, 5 images per  
1403 condition per replicate. Statistics, one-way ANOVA with Tukey's multiple comparisons  
1404 test.  
1405

1406  
1407  
1408  
1409  
1410  
1411  
1412  
1413  
1414  
1415  
1416  
1417  
1418  
1419  
1420  
1421  
1422  
1423  
1424  
1425  
1426  
1427  
1428  
1429  
1430  
1431  
1432  
1433  
1434  
1435  
1436  
1437  
1438  
1439  
1440  
1441  
1442  
1443  
1444  
1445  
1446  
1447  
1448  
1449

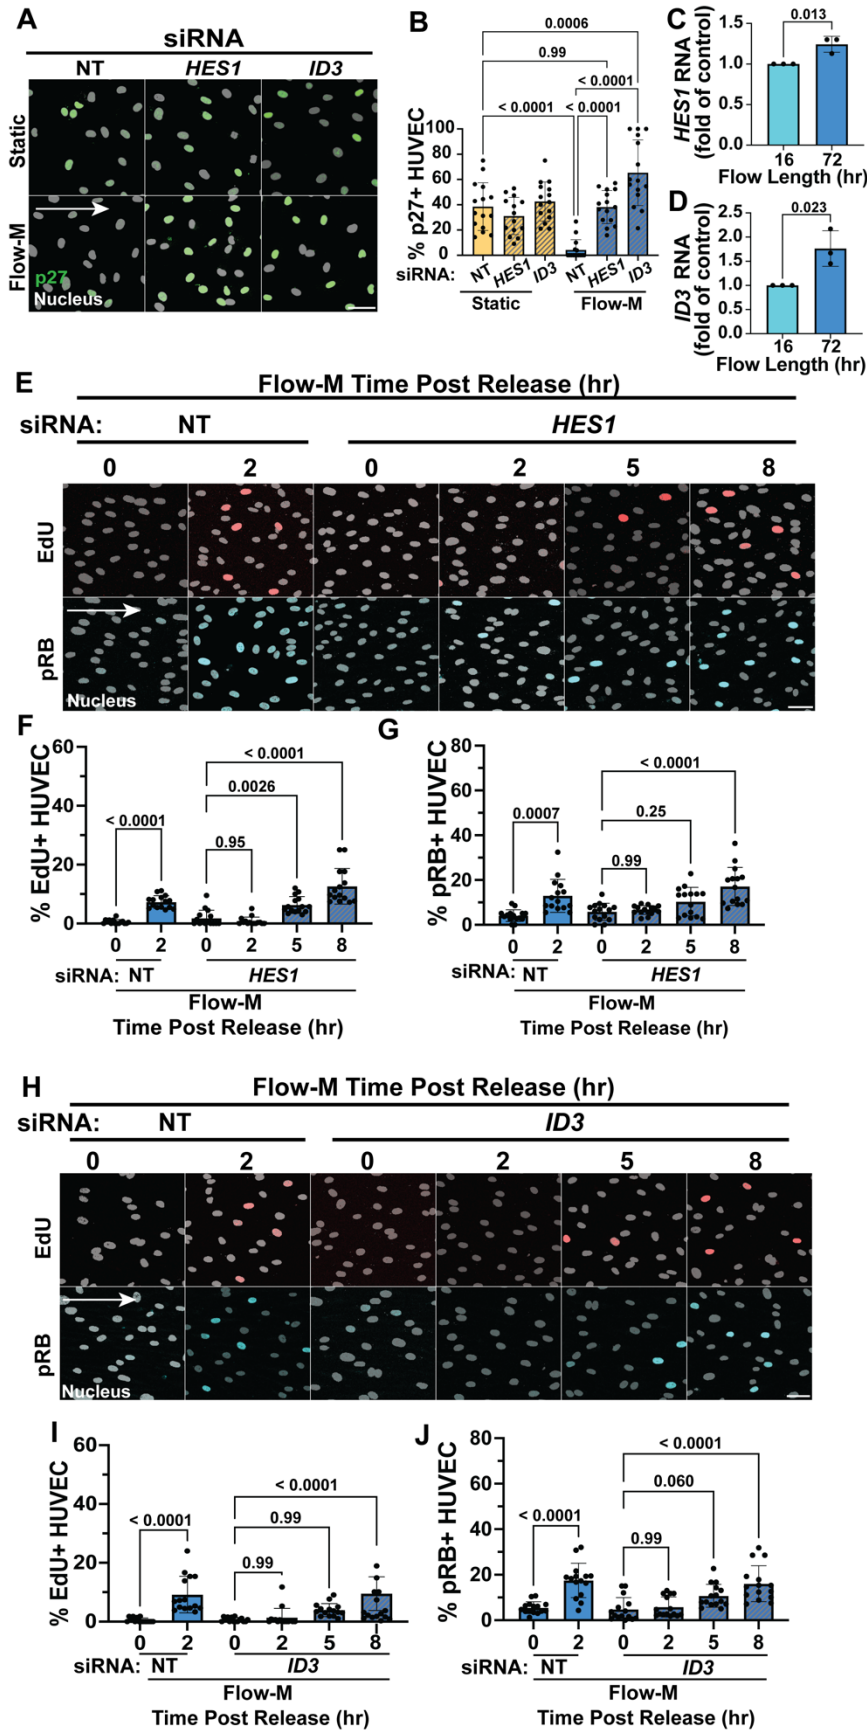

1450 **Figure 6. BMP and NOTCH regulated p27 repressors *HES1* and *ID3* regulate p27**  
1451 **levels and flow-mediated quiescence depth.**  
1452 **(A)** Representative images of HUVEC under indicated conditions and with indicated  
1453 siRNA treatment. Cells stained for p27 (green) and DAPI (white, nuclear mask). Scale  
1454 bar, 50  $\mu$ m. White arrow, flow direction. **(B)** Quantification of p27+ cells under indicated  
1455 conditions and treatments. n=3 replicates, 5 images per condition per replicate. **(C-D)**  
1456 RT-qPCR for *HES1* **(C)** and *ID3* **(D)** levels under indicated conditions. n=3 replicates.  
1457 **(E)** Representative images of HUVEC under indicated conditions and siRNA treatments.  
1458 Cells were labeled with EdU (red, S-phase) and stained for pRB (blue, interphase) and  
1459 DAPI (white, nuclear mask). Scale bar, 50  $\mu$ m. White arrow, flow direction. **(F)**  
1460 Quantification of EdU+ cells with indicated conditions. n=3 replicates, 5 images per  
1461 condition per replicate. **(G)** Quantification of pRB+ cells with indicated conditions. n=3  
1462 replicates, 5 images per condition per replicate. **(H)** Representative images of HUVEC  
1463 under indicated conditions and siRNA treatments. Cells were labeled with EdU (red, S-  
1464 phase) and stained for pRB (blue, interphase) and DAPI (white, nuclear mask). Scale  
1465 bar, 50  $\mu$ m. White arrow, flow direction. **(I)** Quantification of EdU+ cells under indicated  
1466 conditions. n=3 replicates, 5 images per condition per replicate. **(J)** Quantification of  
1467 pRB+ cells under indicated conditions. n=3 replicates, 5 images per condition per  
1468 replicate. Statistics, student's two-tailed *t*-test (C-D) and one-way ANOVA with Tukey's  
1469 multiple comparisons test (B, F-G, I-J).  
1470

1471  
1472  
1473  
1474  
1475  
1476  
1477  
1478  
1479  
1480  
1481  
1482  
1483  
1484  
1485  
1486  
1487  
1488  
1489  
1490  
1491  
1492  
1493  
1494  
1495  
1496  
1497  
1498  
1499  
1500  
1501  
1502  
1503  
1504  
1505  
1506  
1507  
1508  
1509  
1510  
1511  
1512  
1513  
1514

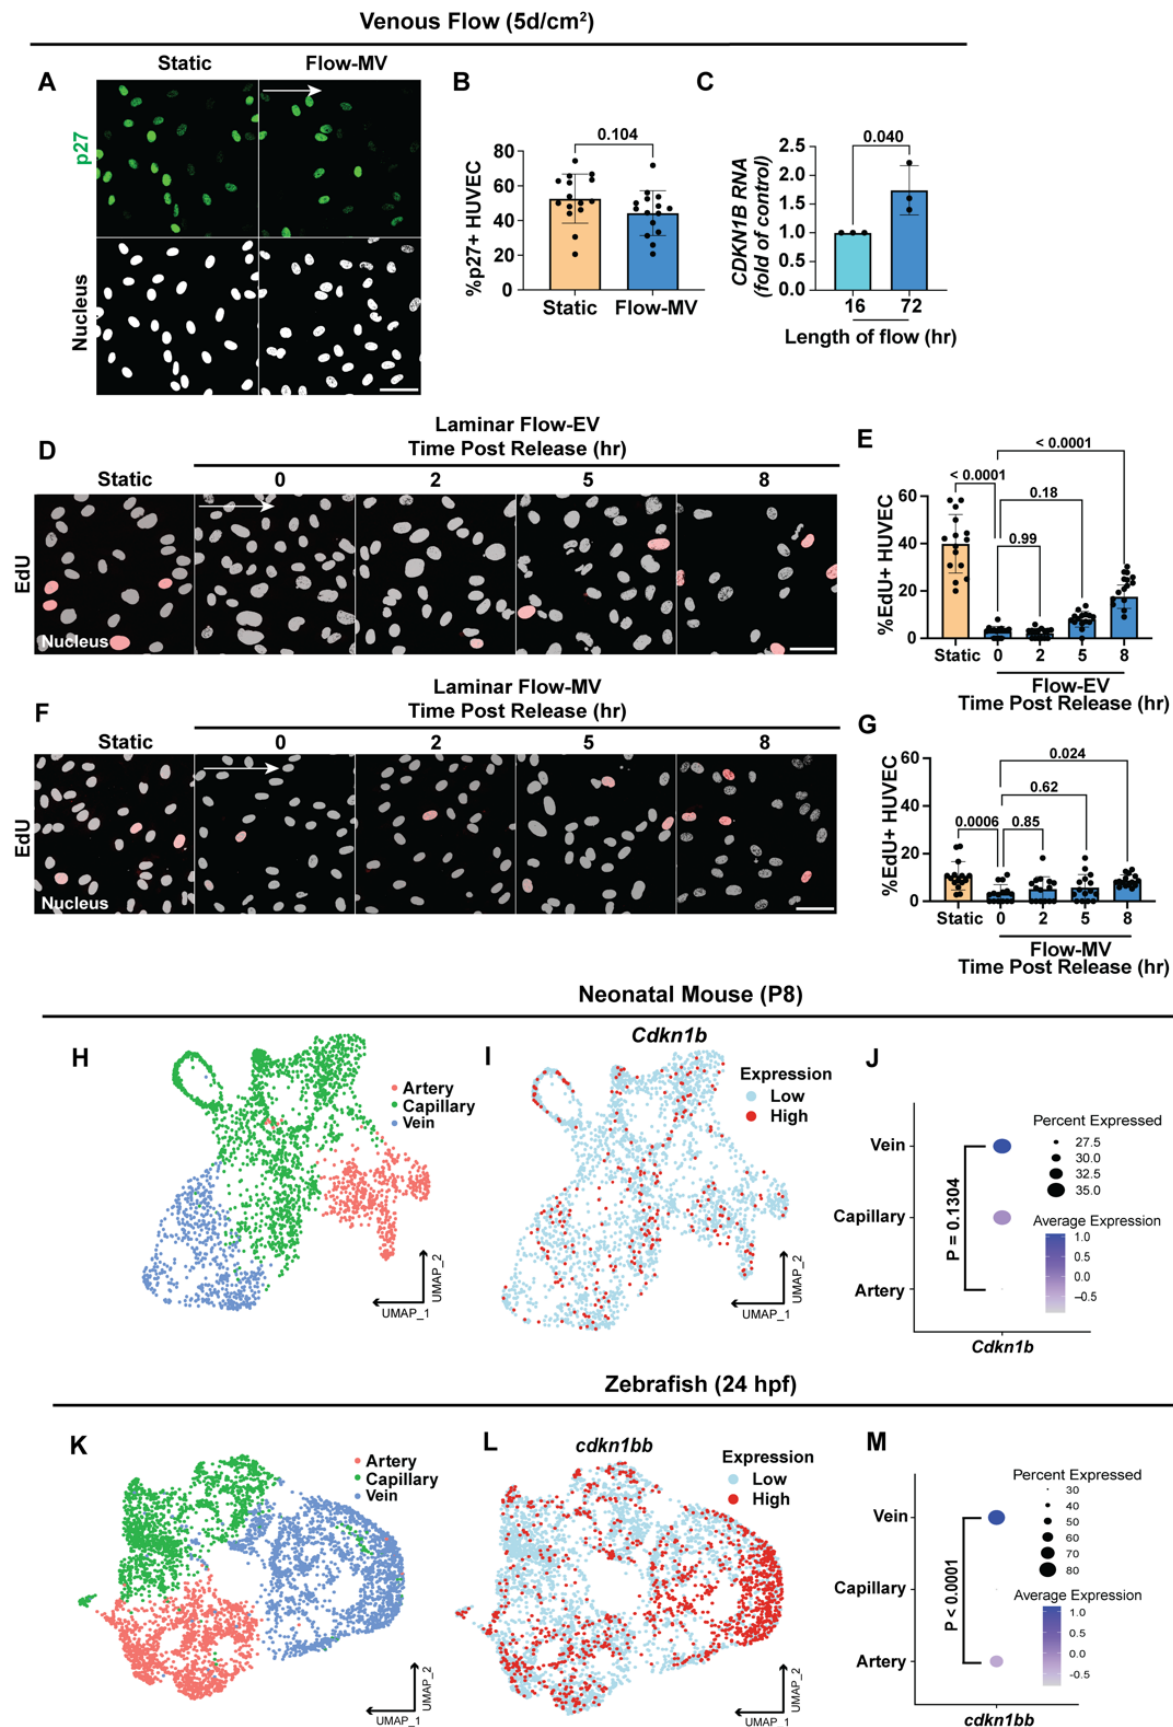



1515 **Figure 7. Endothelial cells establish and maintain deep quiescence under venous**  
1516 **flow and express elevated p27 levels *in vivo*.**

1517 **(A)** Representative images of HUVEC under indicated conditions (Flow-MV (5d/cm<sup>2</sup>,  
1518 72h)) stained for p27 (green) and DAPI (white, nuclear mask). Scale bar, 50 μm. White  
1519 arrow, flow direction. **(B)** Quantification of HUVEC p27+ cells under indicated  
1520 conditions, n=3 replicates, 5 images per condition per replicate. **(C)** RT-qPCR for  
1521 *CDKN1B* levels in indicated conditions. n=3 replicates. **(D)** Representative images of  
1522 HUVEC under static (non-flow) or Flow-EV (5d/cm<sup>2</sup>, 16h) conditions with EdU  
1523 incorporation and fixation at indicated times post Flow-EV release. Cells stained for  
1524 DAPI (white, nuclear mask) and EdU (red, S-phase), Scale bar, 50 μm. White arrow,  
1525 flow direction. **(E)** Quantification of EdU+ cells with indicated conditions. n=3 replicates,  
1526 5 images per condition per replicate. **(F)** Representative images of HUVEC under static  
1527 (non-flow) or Flow-MV conditions (5d/cm<sup>2</sup>, 72h) with EdU incorporation and fixation at  
1528 indicated times post Flow-MV release. Cells stained for DAPI (white, nuclear mask) and  
1529 EdU (red, S-phase), Scale bar, 50 μm. White arrow, flow direction. **(G)** Quantification of  
1530 EdU+ cells with indicated conditions. n=3 replicates, 5 images per condition per  
1531 replicate. **(H)** UMAP grouping of artery, vein, and capillary endothelial cell clusters  
1532 enriched from neonatal mouse ear skin. **(I)** UMAP overlaid with *Cdkn1b* (p27)  
1533 expression. **(J)** Dot plot of *Cdkn1b* expression by endothelial sub-type. **(K)** UMAP  
1534 grouping of endothelial artery, vein, and capillary clusters reanalyzed from 24hpf  
1535 embryonic zebrafish. **(L)** UMAP overlaid with *cdkn1bb* (p27) expression. **(M)** Dot plot of  
1536 *Cdkn1b* expression by endothelial sub-type. Statistics, student's two-tailed *t*-test (B-C,  
1537 J-M) and one-way ANOVA with Tukey's multiple comparisons test (E, G).  
1538

1539  
1540  
1541  
1542

1543  
1544  
1545  
1546  
1547  
1548

1549  
1550  
1551  
1552

1553  
1554  
1555  
1556  
1557  
1558

1559  
1560  
1561

1562  
1563  
1564  
1565

1566  
1567  
1568

1569  
1570

1571  
1572

1573  
1574  
1575

1576  
1577  
1578

1579  
1580  
1581  
1582

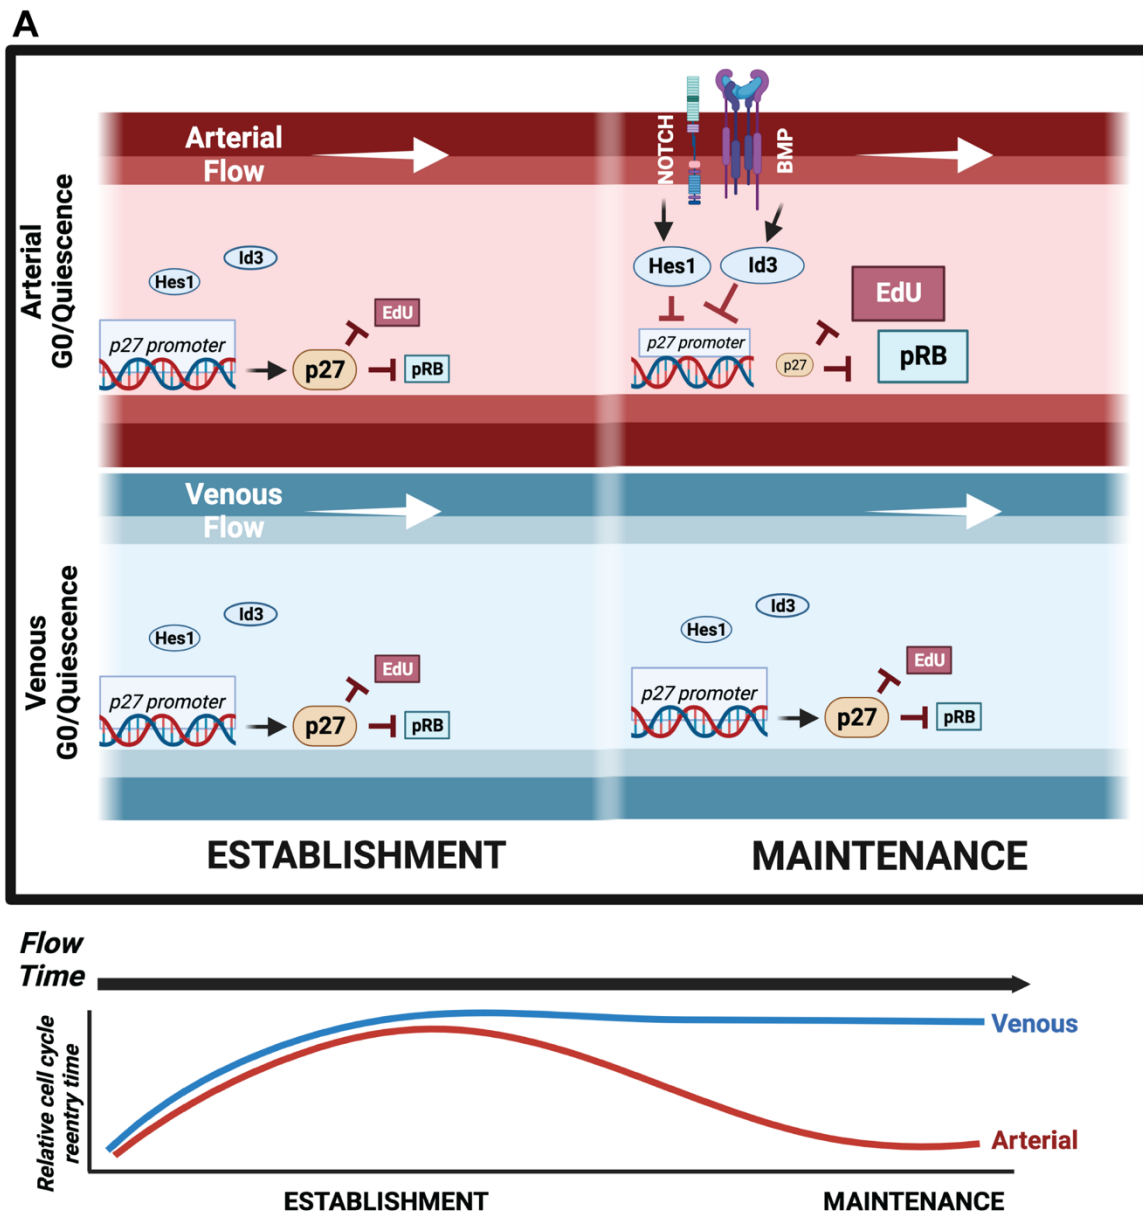

**Figure 8. Model of endothelial cell flow-mediated quiescence depth.**

Proposed model for dynamic regulation of endothelial cell flow-mediated quiescence depth with flow exposure time and magnitude. In the first 16h (Flow-E, arterial flow establishment) of laminar flow, a deep quiescence is established accompanied by high levels of cell cycle inhibitor p27, independent of flow magnitude. With time under arterial flow (Flow-M, flow maintenance), *HES1* and *ID3* transcription factors are upregulated downstream of flow-mediated Notch and BMP signaling, and they repress p27 transcription leading to a shallow quiescence depth. Deep quiescence and high p27 levels characterize venous flow establishment at 16h (Flow-EV, venous flow establishment), and this deep quiescence perdures with time under venous flow (Flow-MV).
